# Supplementary material for: Personalized predictions of patient outcomes during and after hospitalization using artificial intelligence
Source: PubMed Central journal article supplement (PMC7125114; doi:10.1038/s41746-020-0249-z), 2020-04-03
Supplement: 41746_2020_249_MOESM1_ESM.pdf [file 41746_2020_249_MOESM1_ESM.pdf]

# Supplementary Materials

## Contents

|                                                                                                    |    |
|----------------------------------------------------------------------------------------------------|----|
| Supplementary Methods                                                                              | 36 |
| Structuring electronic health record data                                                          | 2  |
| Inclusion Criteria and Outcome Definitions                                                         | 3  |
| Readmission                                                                                        | 3  |
| Length of Stay                                                                                     | 3  |
| Death                                                                                              | 3  |
| Machine Learning Models                                                                            | 4  |
| Interpretation of the final model                                                                  | 5  |
| Statistical analysis                                                                               | 6  |
| Supplementary Figures                                                                              | 8  |
| Supplementary Figure 1. ROC-AUC and calibration curves for readmission and extended length of stay | 8  |
| Supplementary Figure 2. Comparisons of model performances                                          | 9  |
| Supplementary Figure 3. GBM Feature Importances                                                    | 20 |
| Supplementary Figure 4. Examples of Personalized Predictions, extended                             | 22 |
| Supplementary Figure 5. Top SHAP Features.                                                         | 31 |
| Supplementary Figure 6. SHAP Variable Interactions for 30 day readmission                          | 33 |
| Tables                                                                                             | 36 |
| Supplementary Table 1. Model Performance Comparisons                                               | 36 |
| Supplementary Table 2. Categorized variables                                                       | 39 |
| References                                                                                         | 44 |

## Supplementary Methods

### *Structuring electronic health record data*

Cleveland Clinic uses the Epic electronic health record (EHR) system. To generate our databases, statistical techniques including similarity calculations and fuzzy matching, are used to clean, parse, map and validate the raw EHR data. The raw data are extracted from both the EHR and other disparate data sources, mapped to discrete ontologies, cleaned and standardized, and finally deposited into a clinical research data repository. Approximately 185 tables from different data sources are condensed into 18 research-ready tables in the data repository. We utilize identifiers from the freely available Unified Medical Language System (UMLS) to map 6.8 million patient-related terms, as well as approximately half a million custom UMLS identifiers that include providers, locations, and their relationships. The Metathesaurus from the UMLS combines synonymous terms and codes from disparate medical vocabularies into concise terms and identifiers. Only 9% of columns in the data repository (approximately 1,000 data points per patient) do not utilize UMLS identifiers. These non-UMLS columns include patient identifiers, dates, and visit identifiers, which we manually queried for this project. Ultimately, there are approximately 32,000 discrete data elements per patient comprised of both UMLS and non-UMLS data. From this large collection, we selected variables to predict outcomes during hospitalization based on expert opinion and published literature, then extracted these into tables suitable for machine learning algorithms.<sup>1</sup> The total number of variables for each prediction task varied based on which features would be appropriate, ranging from 285 for prediction of 30-day readmission (including variables that would be available at the

beginning, during the duration, and at the end of the admission), to 171 for length of stay (including only variables that would be available during the first 24-hours of admission). See Supplementary Tables 1 and 2 for a list of the variables that were used overall (Supplementary Table 1) and for each predictive task (Supplementary Table 2).

## Inclusion Criteria and Outcome Definitions

### *Readmission*

Readmission was defined as any new Cleveland Clinic (CC) hospitalization starting 4 hours after any CCF discharge. For prediction of readmission, patients whose discharge disposition was “expired” were removed. Patients with an admission class of “observation” were retained, as it has been suggested that readmission reduction programs have resulted in an increased use of the observational setting.<sup>2,3</sup> The 4 hour cutoff removed patients who were simply transferring from one CCF department or hospital to another, and was selected based on histogram analysis of first-day readmissions.

### *Length of Stay*

Length of stay was defined as the time between a given discharge date and admission date for each hospitalization. Only variables available within 24 hours of admission were considered with the exception of primary diagnosis code, and patients with an admission class of “observation” were removed.

### *Death*

Death within 48–72 hours of admission was defined as a recorded EHR, Social Security, or Ohio Death Index death date, or a discharge disposition of “expired,” within the given time frame. Only variables available within 24 hours of admission were

considered with the exception of primary diagnosis code, and patients with an admission class of “observation” were removed.

### Machine Learning Models

We used Gradient Boosting Machines (GBMs) to predict binary and numeric outcomes of interest. Gradient boosting machines function by consecutively training decision trees to predict the outcome of interest. Each consecutive tree learns from the ensemble of predictions that came before it, and attempts to minimize the error of the current prediction.<sup>4</sup> The GBM implemented by LightGBM contains several optimizations that allow it to obtain robust models quickly. The chief optimization is on-the-fly binning of continuous variables into discrete buckets, in order to allow for more straightforward splitting of the decision tree.<sup>5</sup>

As mentioned in the main text, Gradient Boosting Machines, and LightGBM in particular, allow for heterogeneous data input, including variables with a large number of categories, missing values, and zero values. They do therefore not require imputation, which is advantageous when the lack of a variable for a particular case is important (as in a patient who has never been admitted before and therefore has a “Length of stay of last admission” of “missing,” rather than “zero,” which may indicate something entirely different). Additionally, not every patient has the same set of labs drawn, and it would be inappropriate to impute values for these, especially if the imputation was based on the average or median value across the cohort, considering that many patients are likely to have abnormal values if the lab warranted being drawn. GBMs also do not require scaling, rendering the output of the explanations more human-readable. Lastly, because of the nonlinear combinations of variables probable

in a large healthcare dataset, a tree-based method such as GBM may be more interpretable than a linear model. This is primarily due to the likelihood of the latter to exhibit greater sensitivity to “model mismatch,” wherein the high-bias nature of the linear model cannot adequately represent the underlying nature of the data, and so may be more likely to report spurious associations even at a comparable accuracy.<sup>6</sup>

We used Bayesian hyperparameter optimization, as available in the Python package `hyperopt`, to select hyperparameters for the main predictive targets.

We also used several comparator models, including a deep neural network within the Pytorch framework as implemented by `fast.ai` and several standard ML models from `sklearn`. Standard data imputation and scaling techniques were applied to the data to allow ingestion by the models.

### Interpretation of the final model

The SHAP packages provides utilities for calculating Shapley values for a variety of machine learning algorithms, and is optimized for tree-based algorithms such as GBM. Shapley values come from classical game theory, and are the only additive feature attribution method that yield the combination of local accuracy, consistency, and allowance for missingness.<sup>6,7</sup>

SHAP values may be used to explain a model globally, by examining the average contribution of a given feature to the model output, or locally, by examining the most important variables for a given prediction.<sup>7</sup> They may also be used to examine interactions between variables. SHAP values were generated using the Python package `shap` v0.28.5. Visualizations were created using the Python package `matplotlib` v3.0.311, as well as the LaTeX typesetting language, as appropriate.

## Statistical analysis

ROC curves, precision-recall curves, and calibration plots were generated for visual assessments of model performance. Additionally, summary values for these were calculated, including Brier scores for calibration plots, average precision for the precision-recall curves, and ROC AUC for ROC curves.

Calibration curves are used to assess the trustworthiness of a model's predicted probability. They provide a visual representation of the model's predicted probability vs. the fraction of samples at that probability with the actual outcome. The curve of perfectly calibrated model would exhibit a straight 45° line. Lower Brier scores are better, with a score <0.25 generally considered indicative of a useful model.<sup>8</sup> They are calculated as the mean squared difference between the probability assigned to each sample and the actual outcome (1 or 0).<sup>8</sup>

ROC curves, the corresponding ROC AUC, and precision-recall curves, with the average precision metric, show classification performance at all possible classification thresholds.<sup>9</sup> Higher numbers are better. ROC AUC and average precision of 0.5 indicate a model that performs no better than chance. An AUC of 1.0 indicates 100% true positive and 0% false positive rates, while an average precision of 1.0 indicates a positive predictive value of 100%. Confusion matrices show the number of samples correctly and incorrectly classified.

RMSE is calculated as the square root of the average of squared errors, or difference between observed and expected values, and yields a metric in the same units as the predictive target (here, days or years).<sup>10</sup> Median absolute error is the median absolute difference between the predicted target and the actual value, and

mean absolute error is the mean of the same. R2 scores are the percentage of the target variable variation captured by the model, where 100% indicates a model that explains all of the variability and 0% indicates a model that explains none.

## Supplementary Figures

### Supplementary Figure 1. ROC-AUC and calibration curves for readmission and extended length of stay

**a** Receiver operator characteristic curve for 30-day readmission. **b** Calibration curve for 30-day readmission.

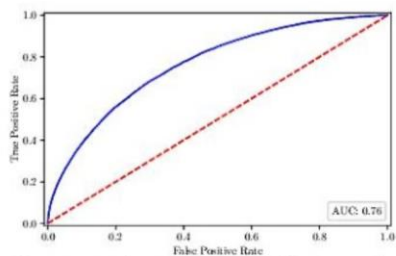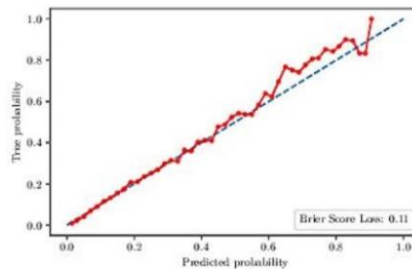

**c** Receiver operator characteristic curve for length of stay over 5 days. **d** Calibration curve for length of stay over 5 days.

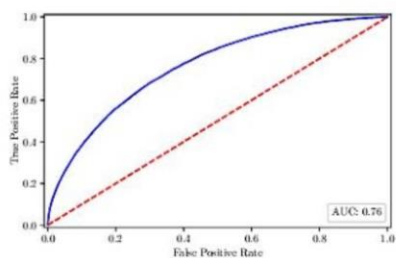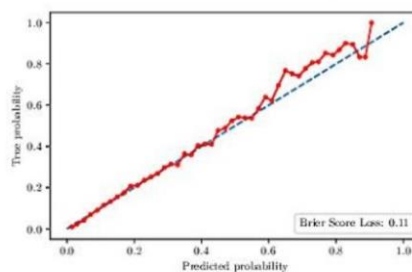



Supplementary Figure 2. Comparisons of model performances

a. Comparison of model calibration for 30 day readmission

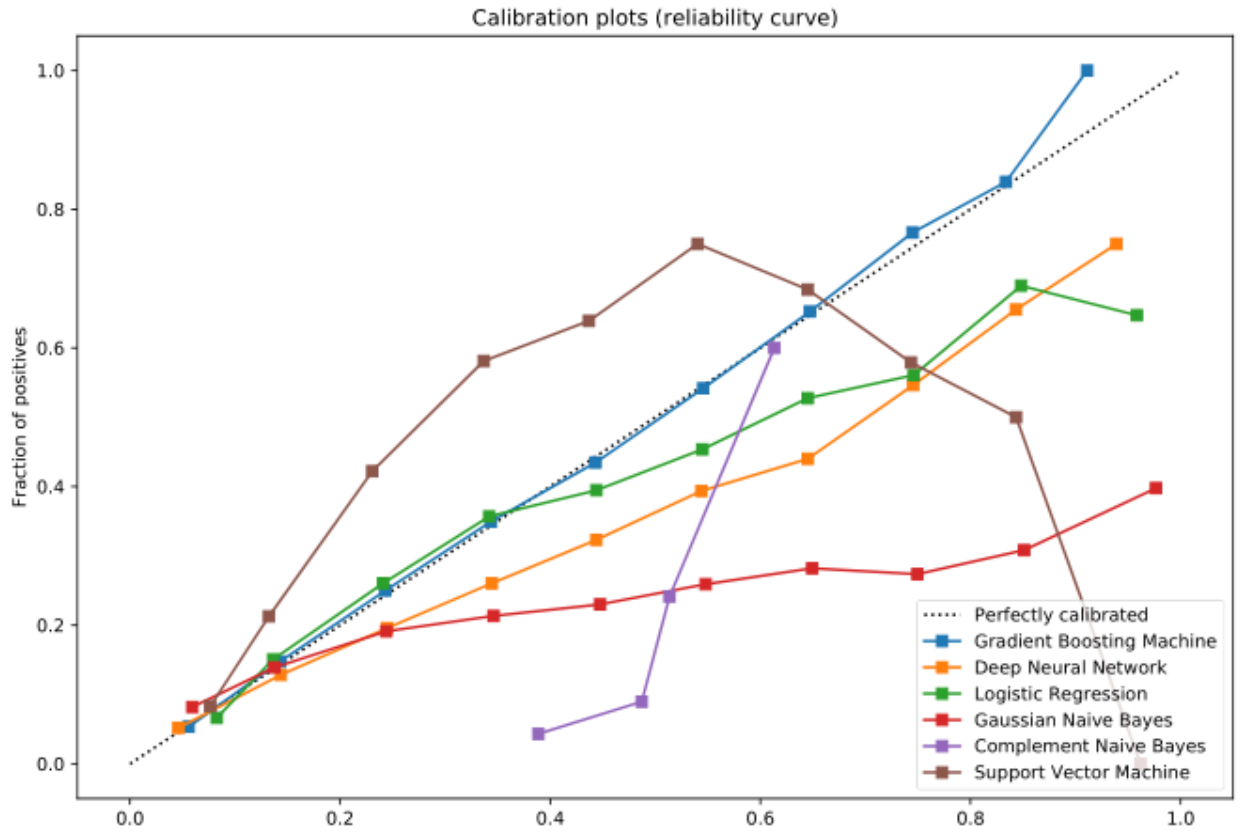

b. Comparison of model calibration for length of stay > 5 days

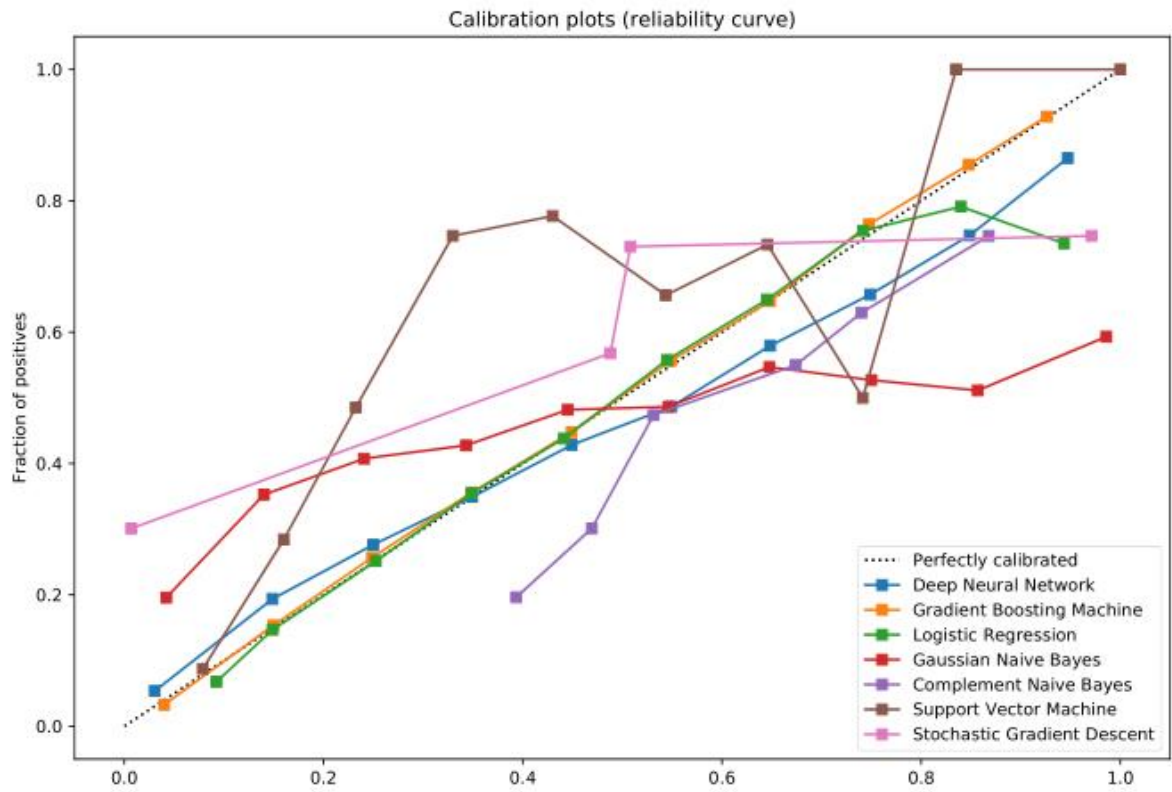

c. Precision-Recall Curve for 30 day readmission

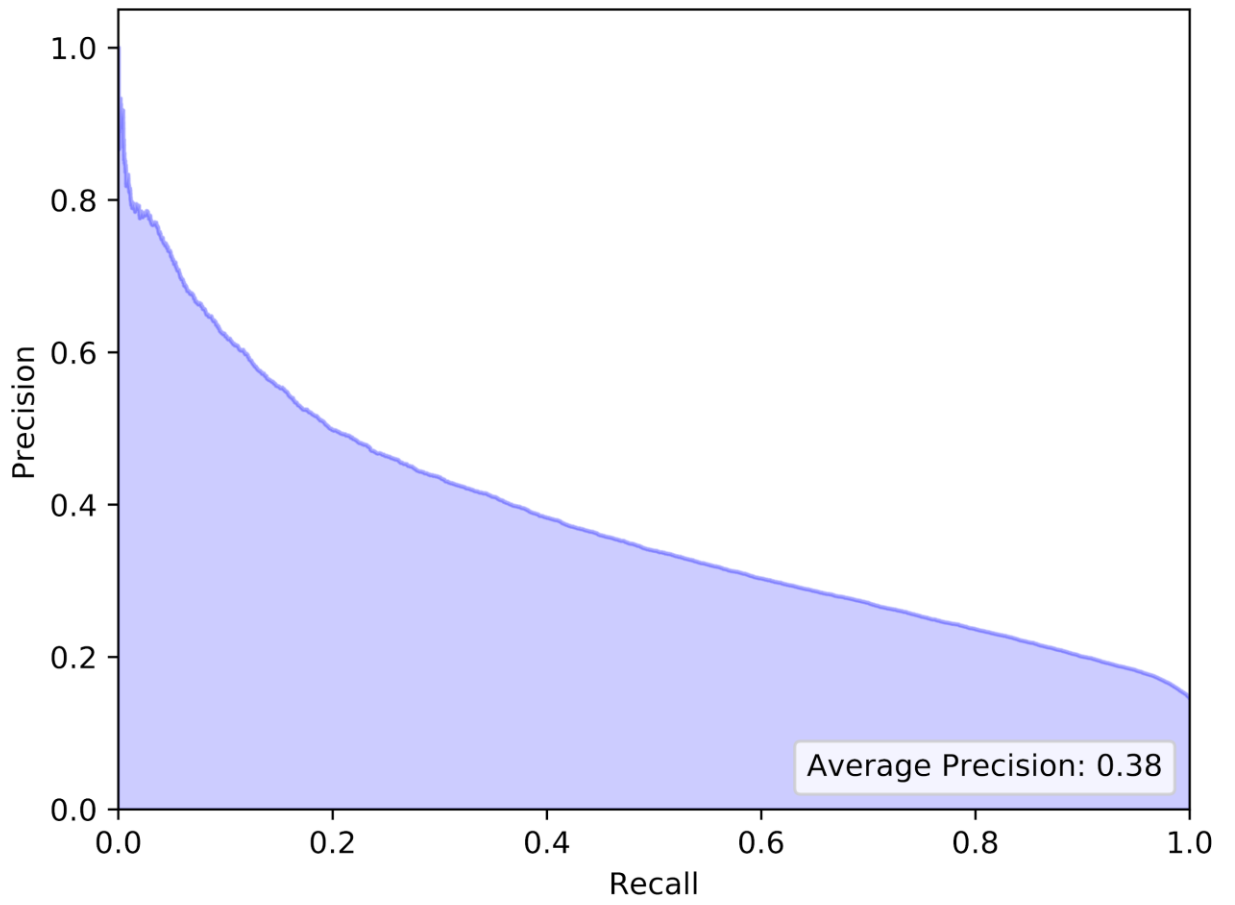

d. Precision-Recall Curve for length of stay > 5 days

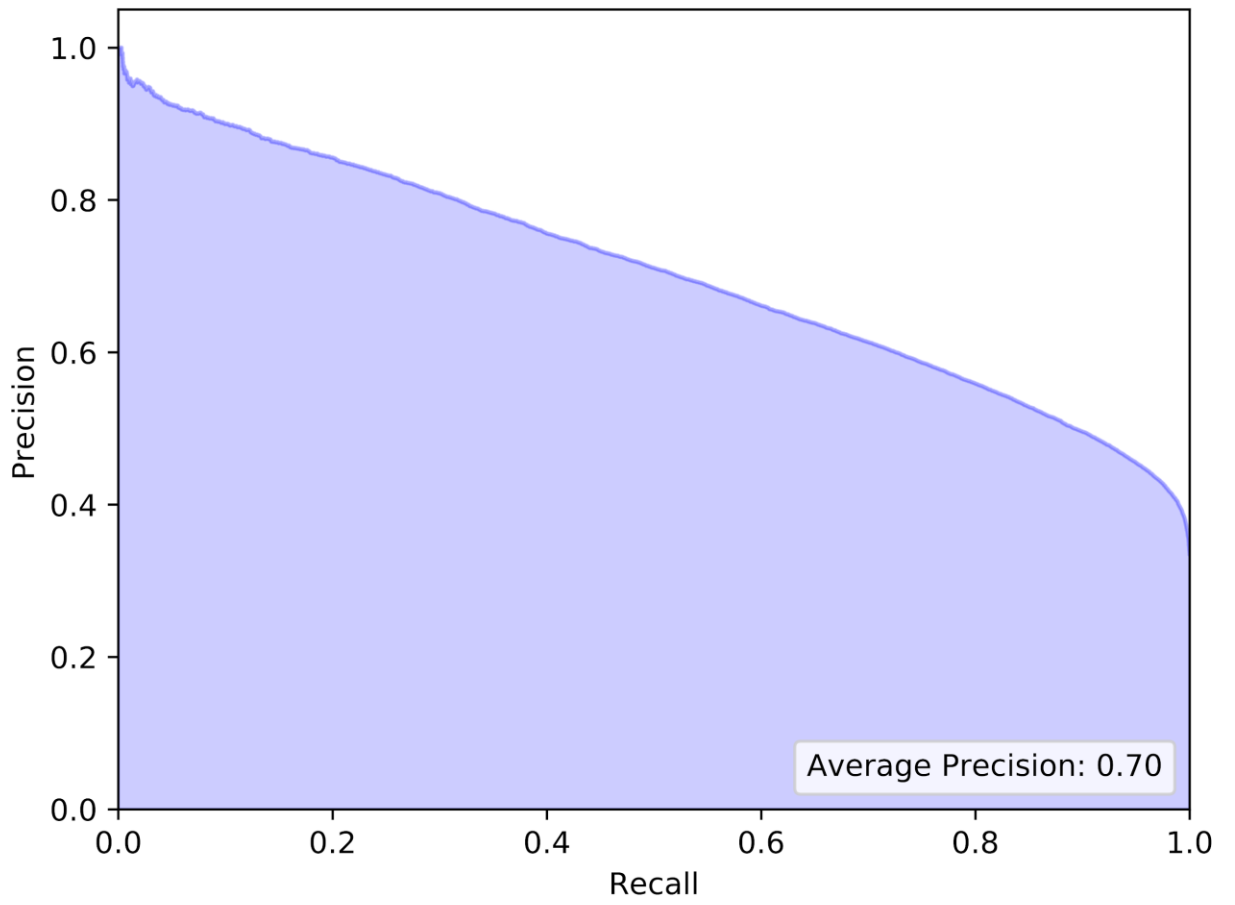

- e. Extended model comparison figures for 30 day readmission (10x 10-fold cross validation)

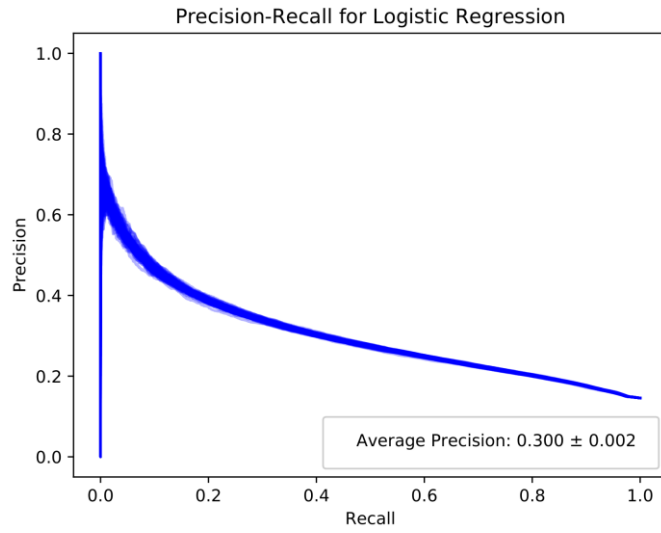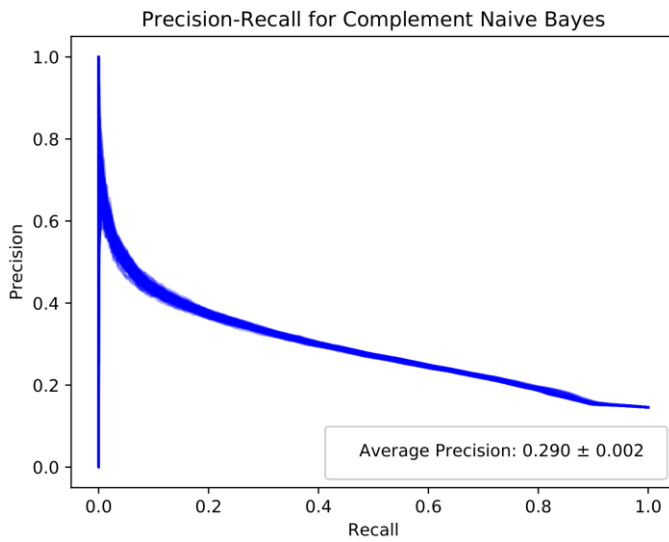

## 30d readmission

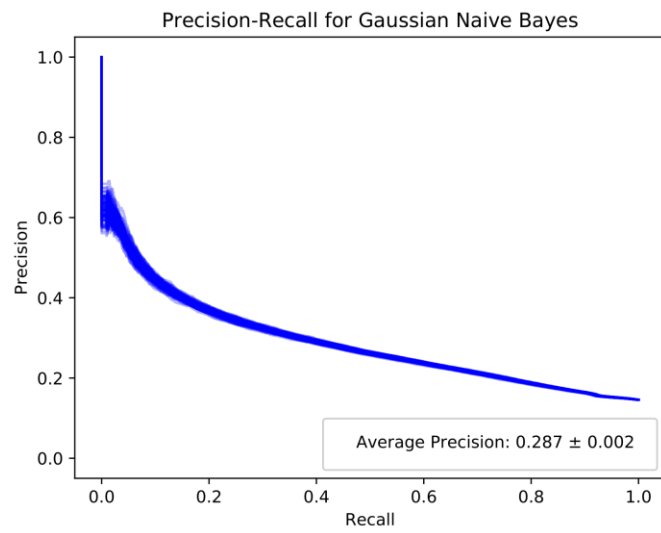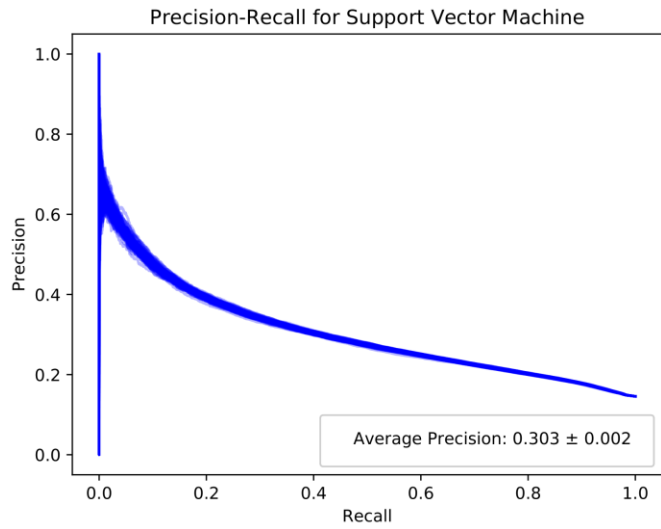

## 30d readmission

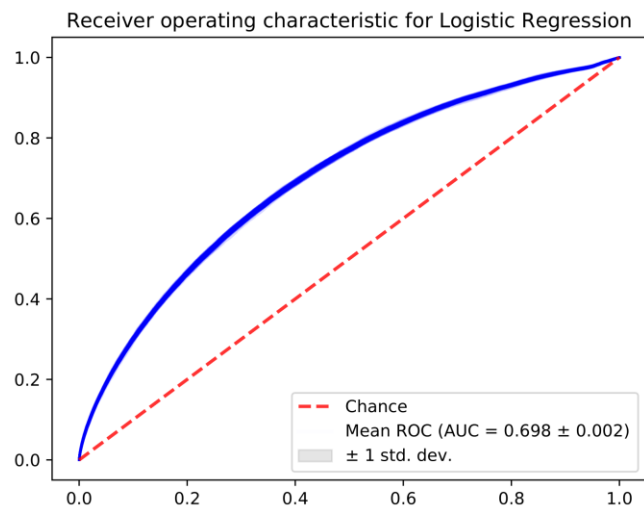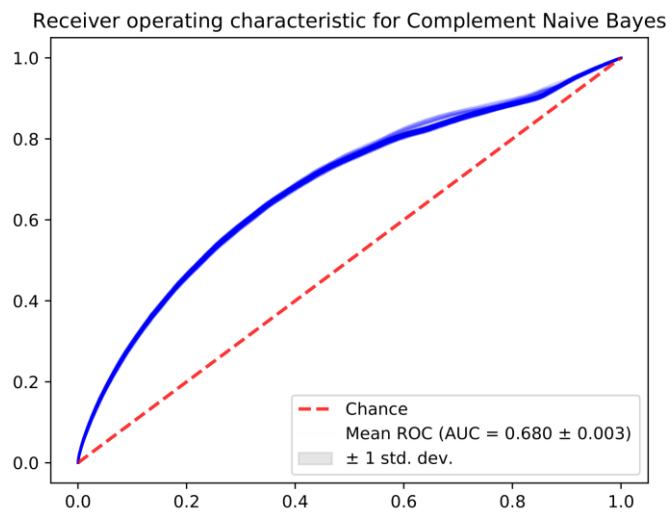

## 30d readmission

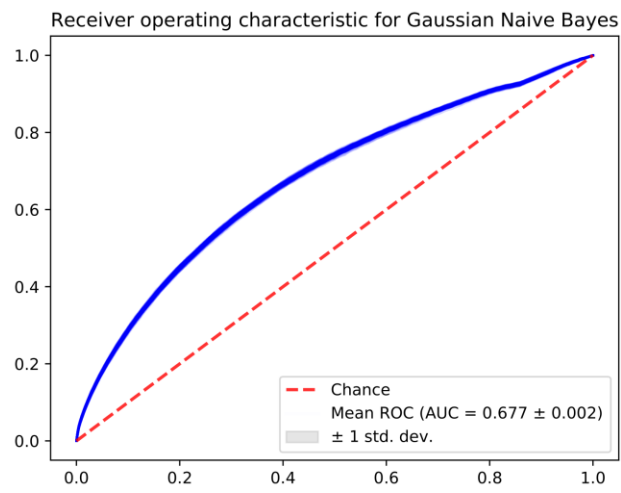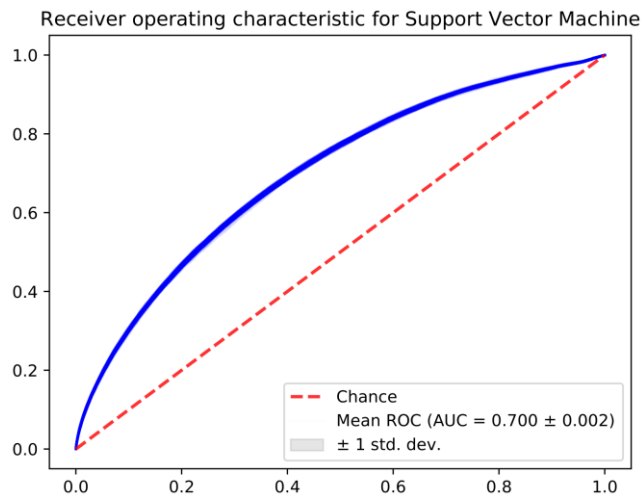



f. Extended model comparison for length of stay > 5 days (10x 10-fold cross validation)

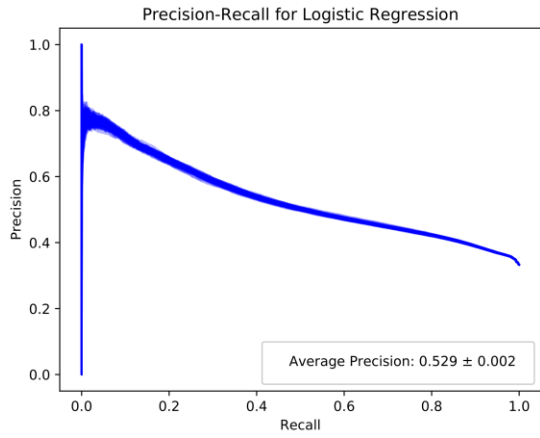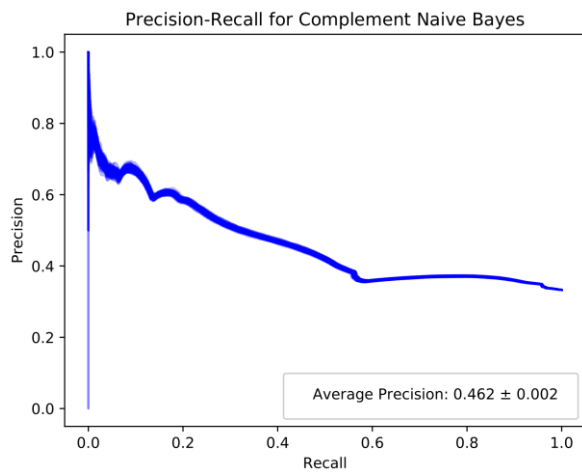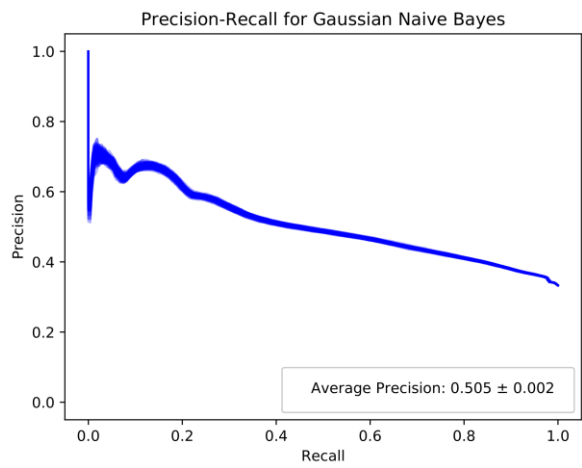

LOS > 5d

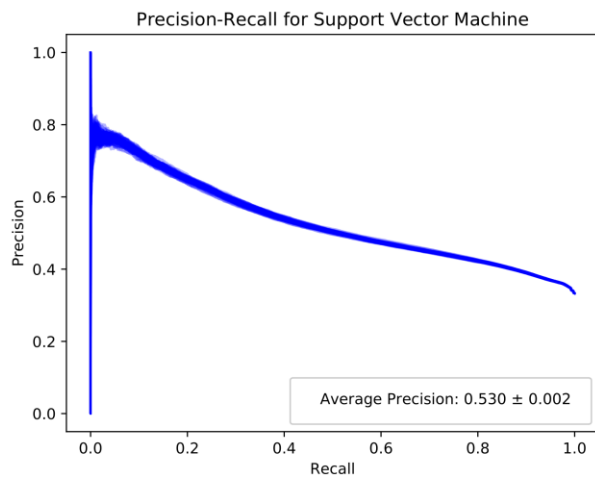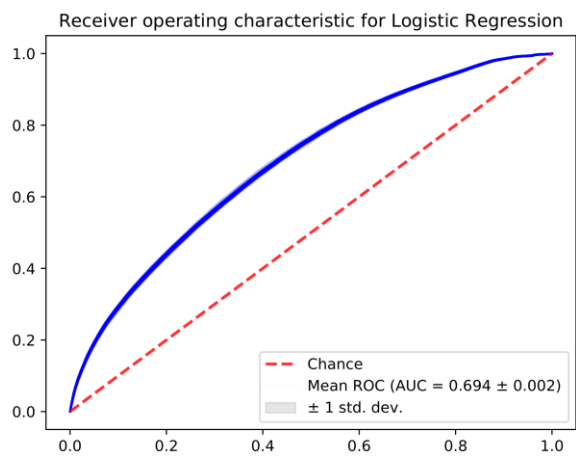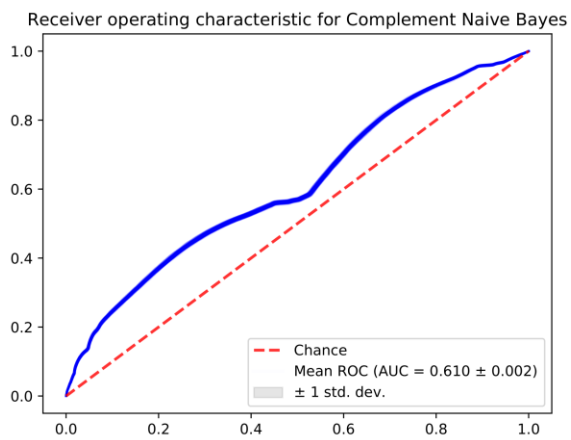

LOS >5d

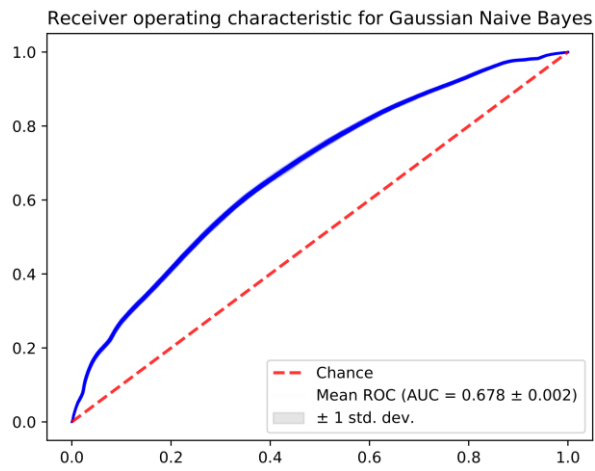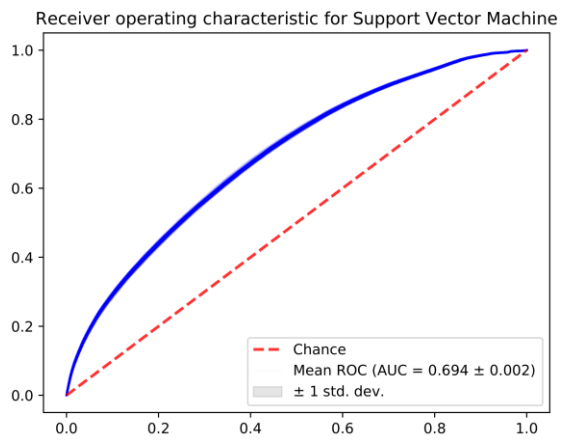

### Supplementary Figure 3. GBM Feature Importances

#### a. GBM feature importance (not SHAP), 30 Day Readmission

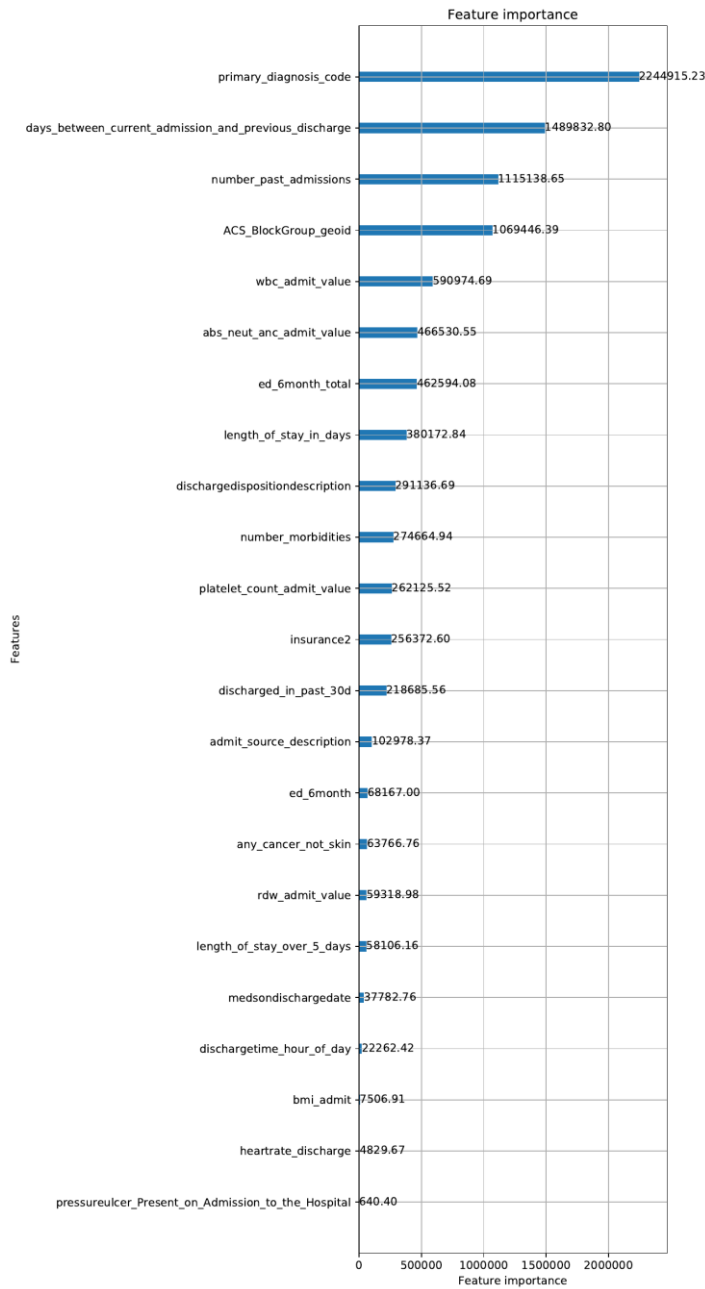

b. GBM feature importance (not SHAP), Length of Stay > 5d

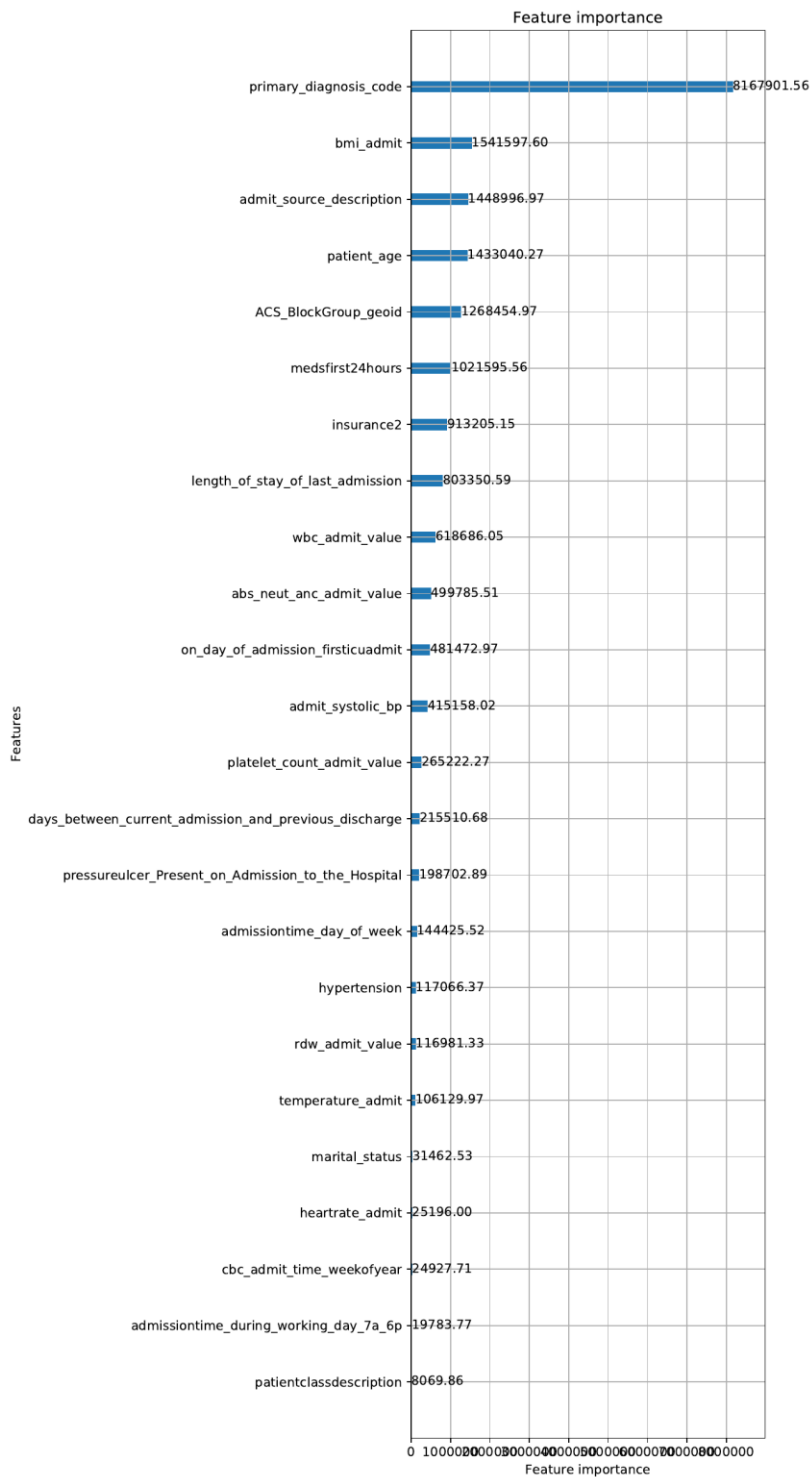

## Supplementary Figure 4. Examples of Personalized Predictions, extended

### a. Readmitted within 30 days

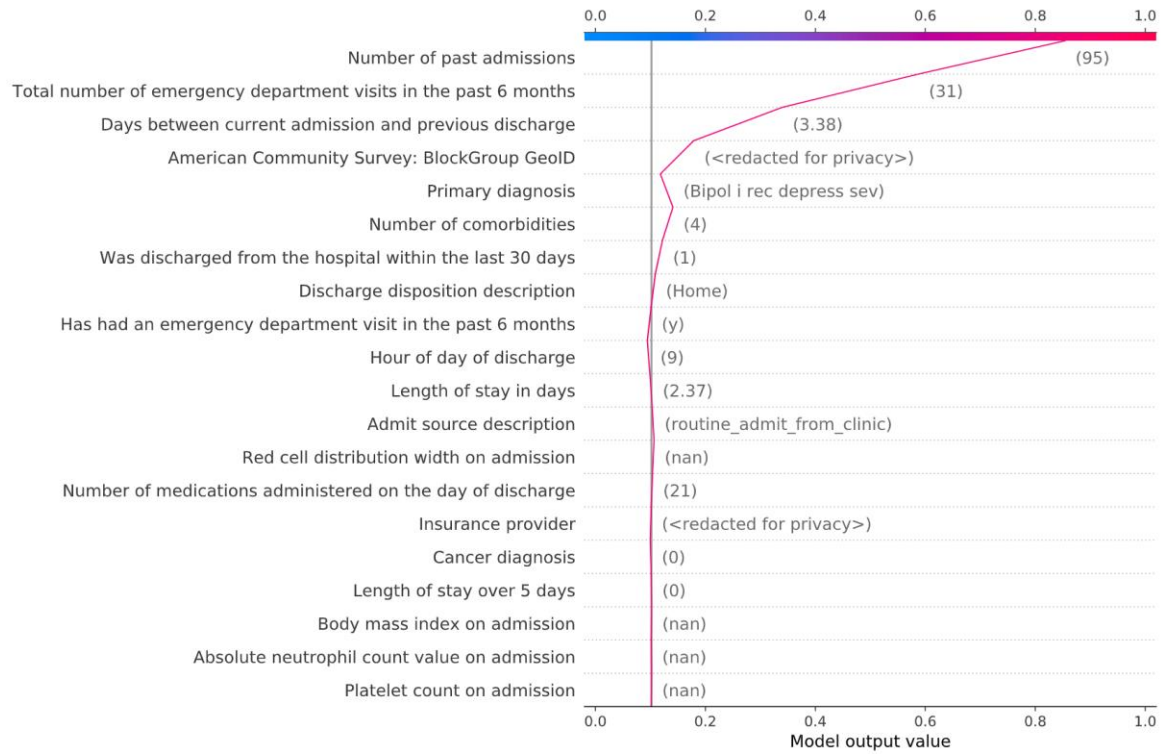

Pt with high probability of readmission within 30 days, largely due to significant history of admission and readmission, in addition to BlockGroup GeoID and other factors. Interestingly, the primary diagnosis (Bipolar disorder) decreased the likelihood of readmission.

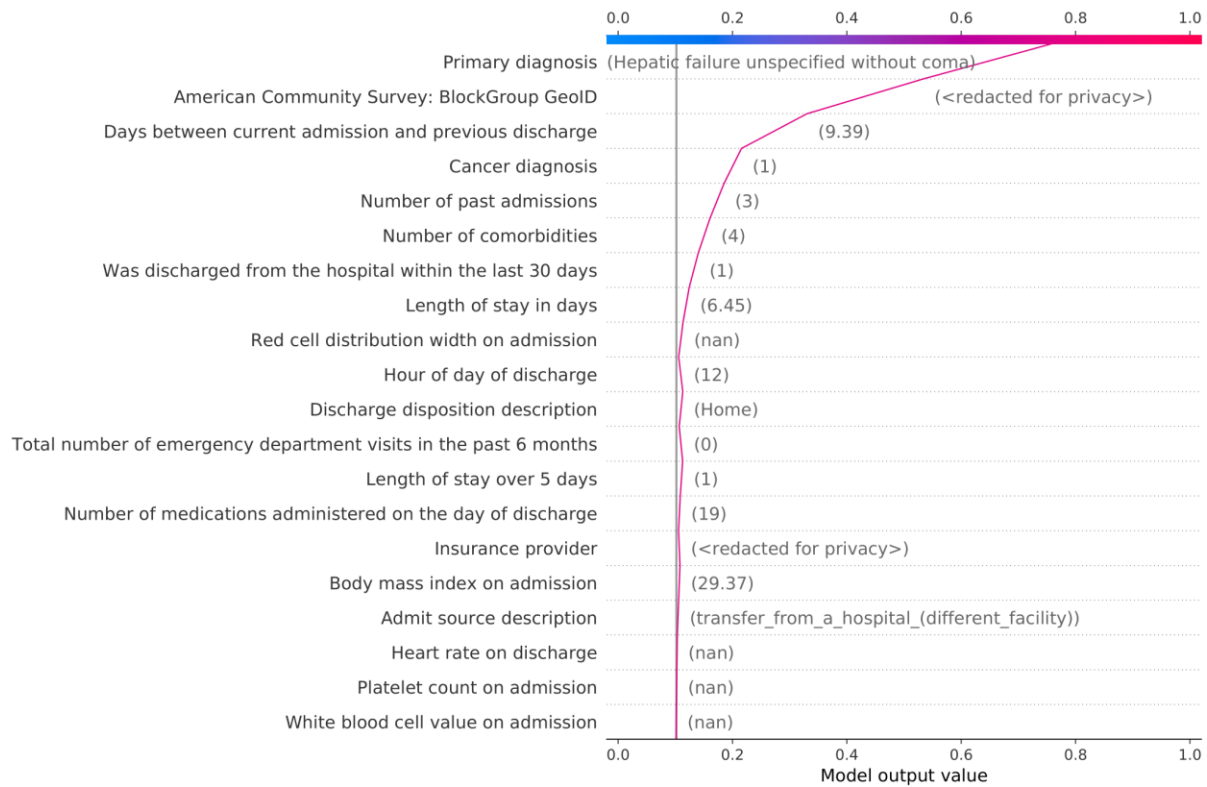

Another pt with high probability of readmission within 30 days, primarily due to a diagnosis of hepatic failure, in addition to their BlockGroup GeoID, recent admission, and cancer diagnosis. Number of past admissions played a role, but a less extreme one compared to the example above.

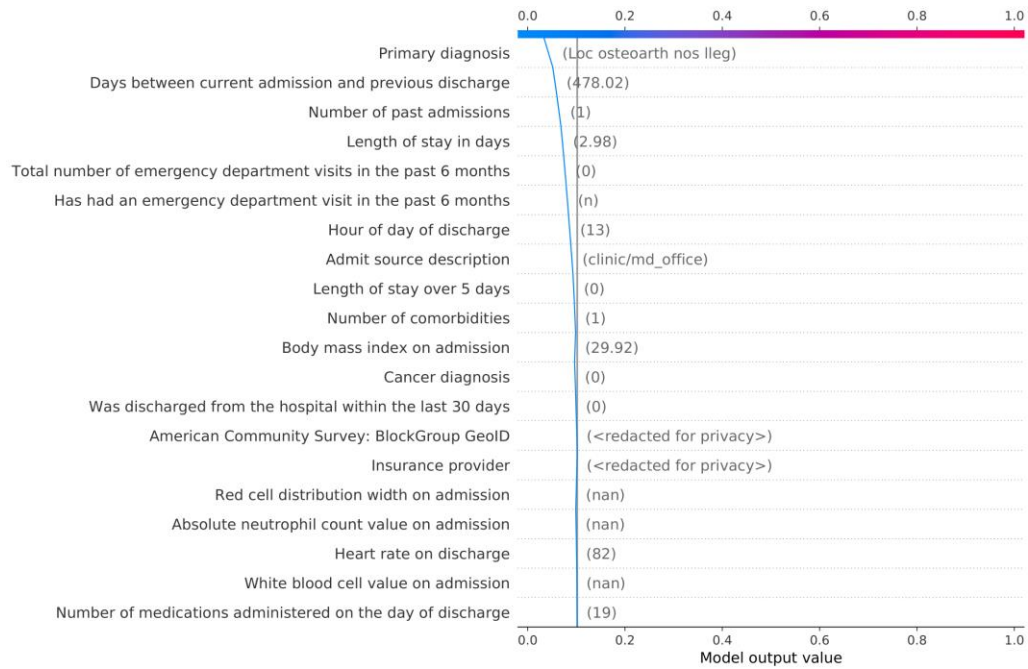

Pt with very low probability of readmission within 30 days, largely due to a diagnosis of osteoarthritis, a single prior admission that was over a year before the current admission, a short length of stay, and other variables as shown.



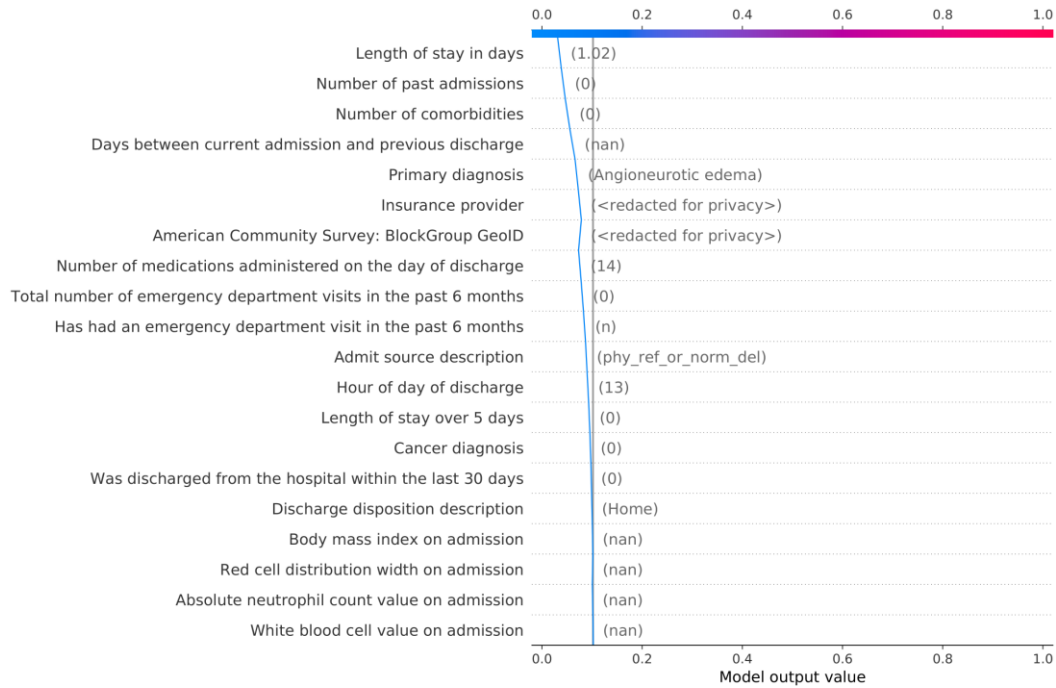

Another pt with very low probability of readmission within 30 days, largely due to a very short length of stay for angioneurotic edema, no prior admissions or listed comorbidities, and low number of listed medications on the day of discharge (all prescribed treatments are counted in this number).

b. Length of stay > 5 days

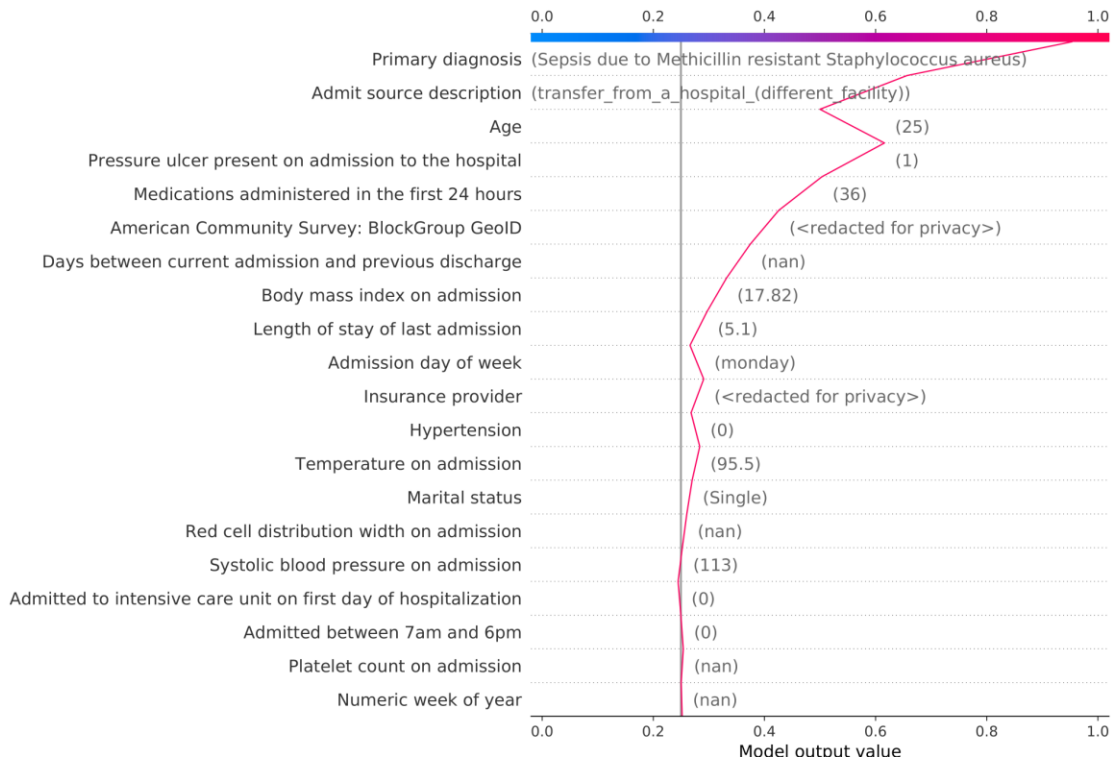

Young pt with MRSA-related sepsis transferred to our facility, with a nearly 100% probability of LOS >5d.

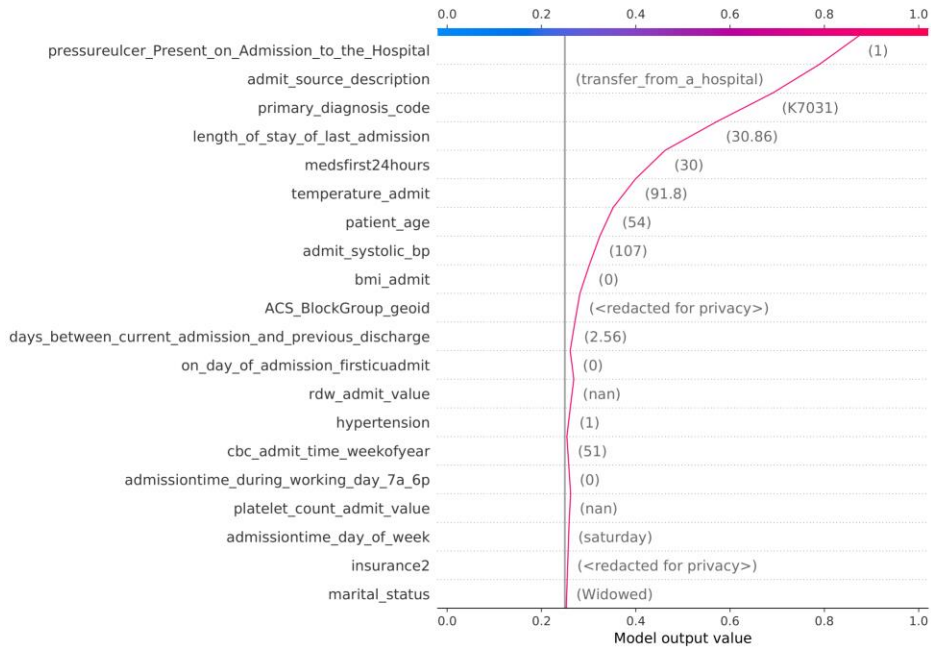

Pt with alcoholic liver cirrhosis (K7031) transferred to our hospital with a pressure ulcer and a lengthy prior admission, with a non-recorded BMI and low systolic blood pressure, but no ICU admission. Assigned ~90% probability of long LOS.

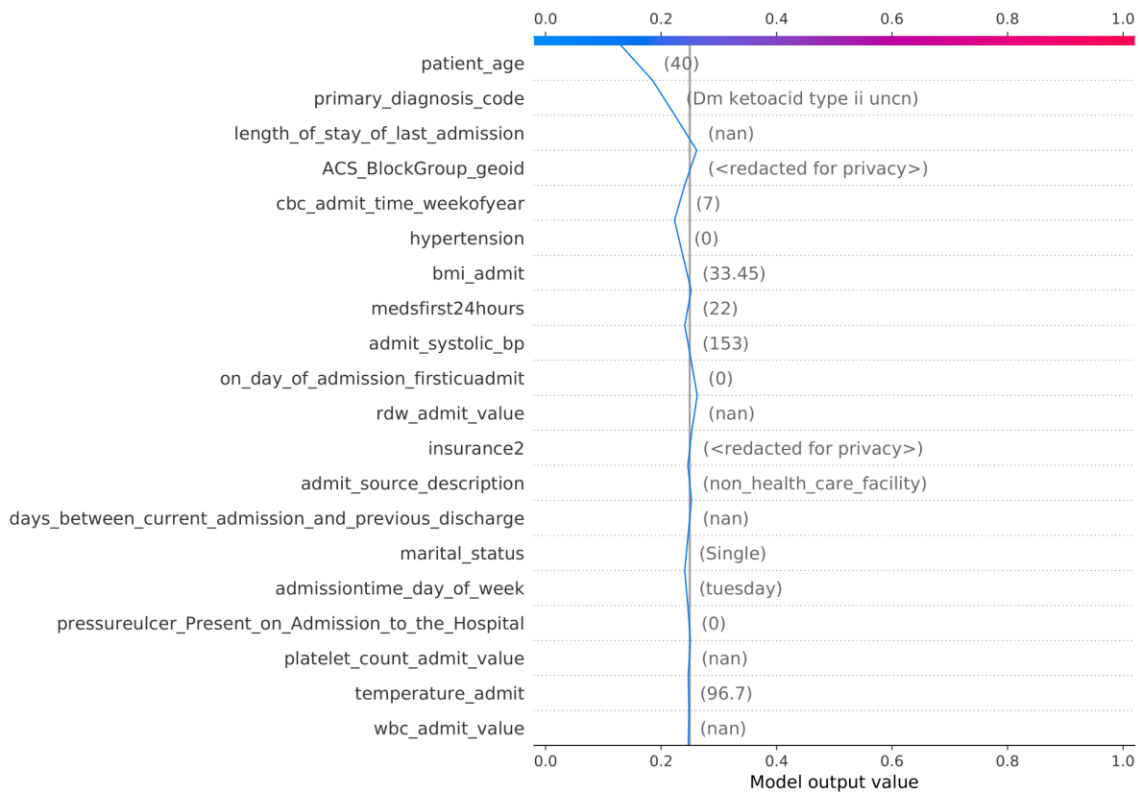

Relatively young pt with Type 2 Diabetes admitted for ketoacidosis, who had never been admitted before. Assigned a probability of LOS >5d ~15%.

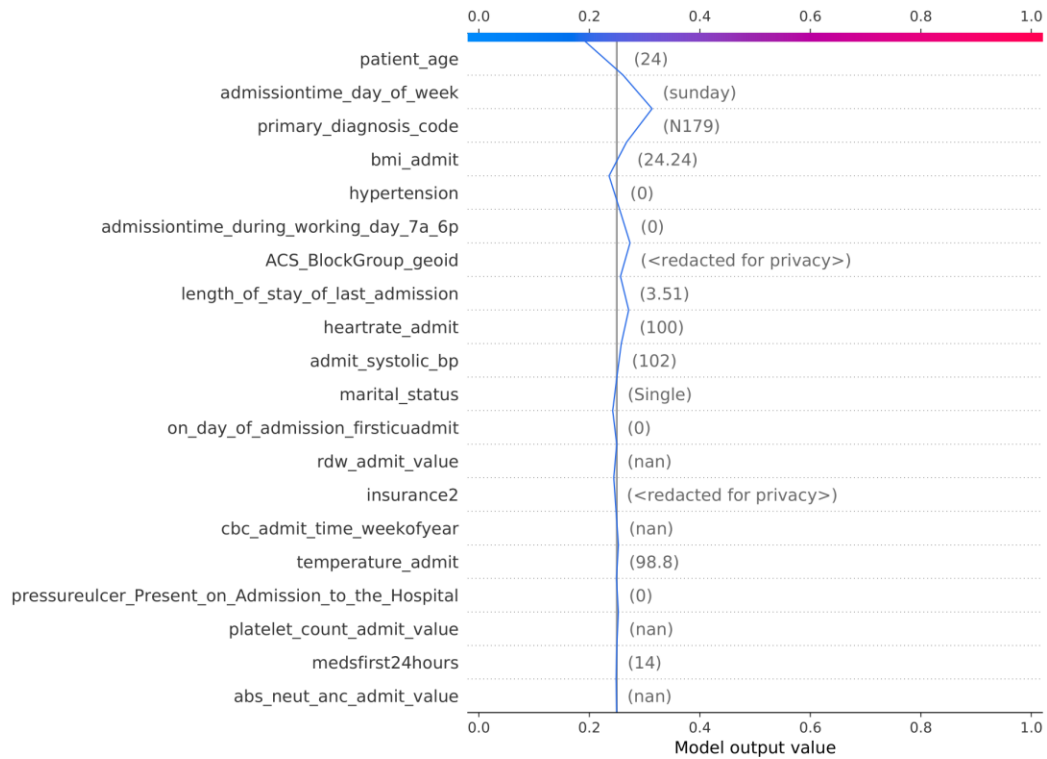

24 year old pt with primary diagnosis of acute kidney failure unspecified, admitted on a Sunday outside of normal working hours, with a probability of long LOS just under 20%.

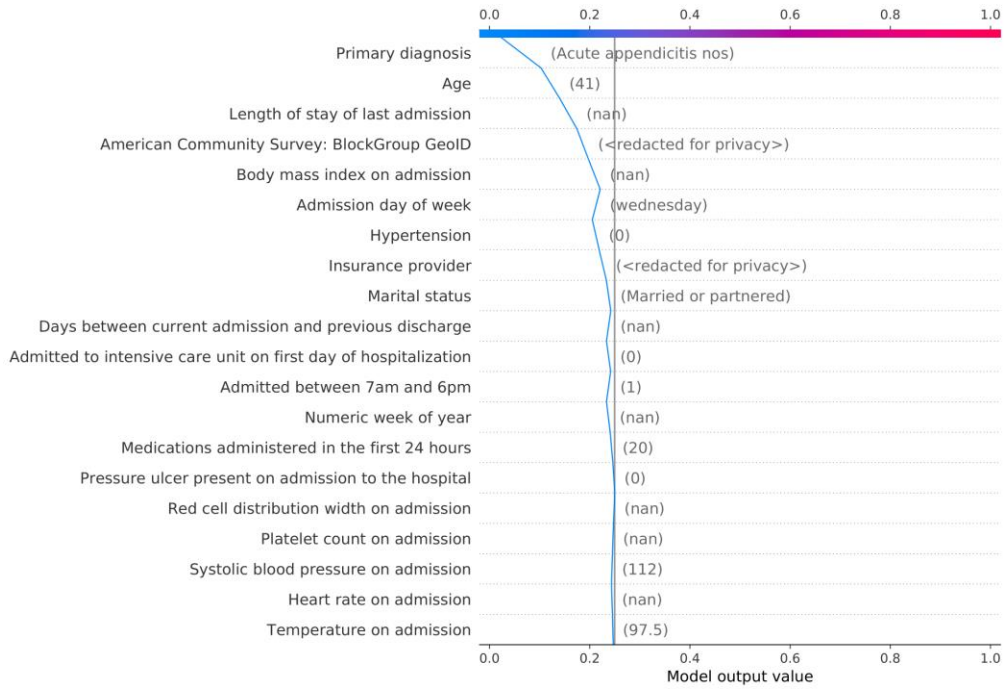

41 year old pt admitted on Wednesday during the working day for acute appendicitis, who had never had any recorded prior admissions and did not have BMI recorded at this admission.

## Supplementary Figure 5. Top SHAP Features.

### a. 3-day readmission

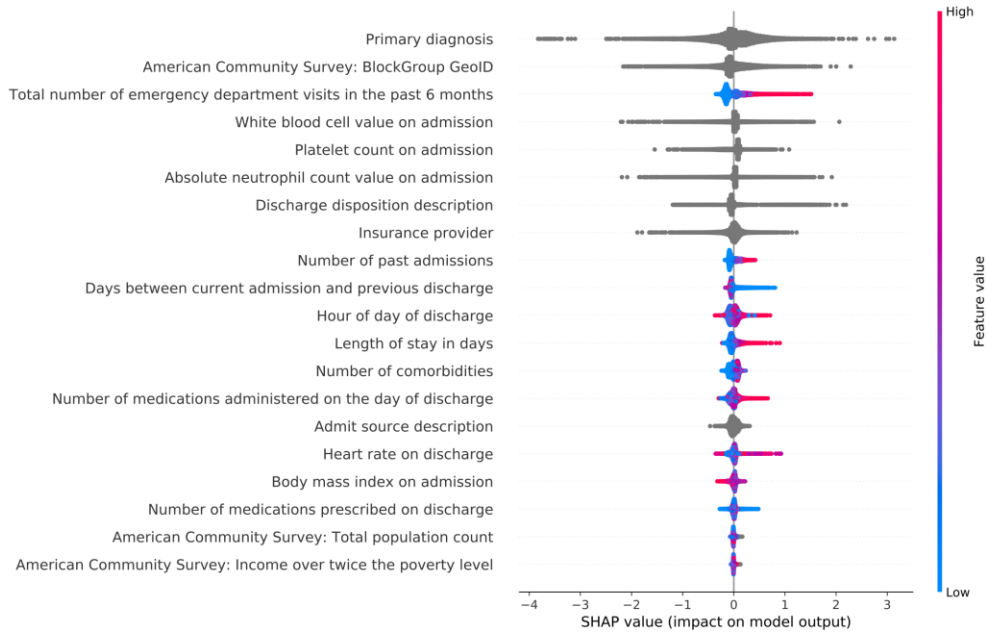

### b. 7-day readmission

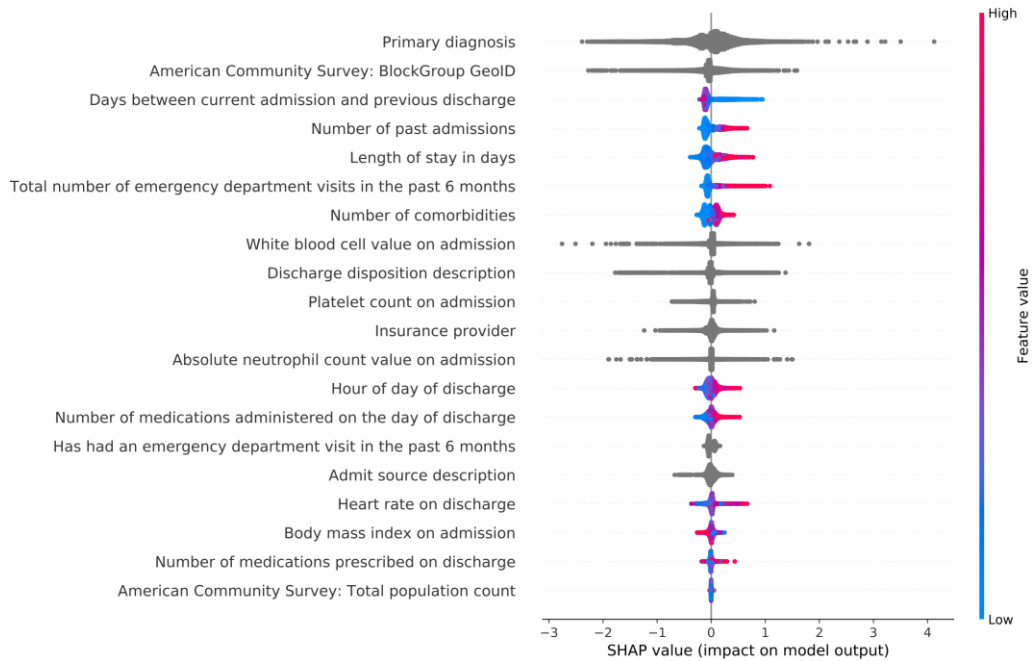

### c. Length of stay over 3 days

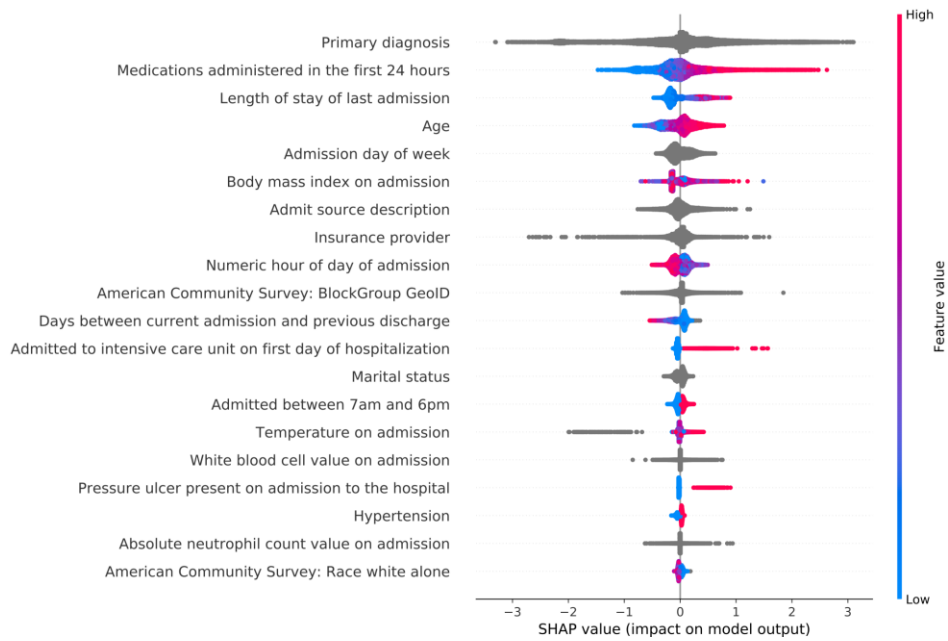

### d. Length of stay over 7 days

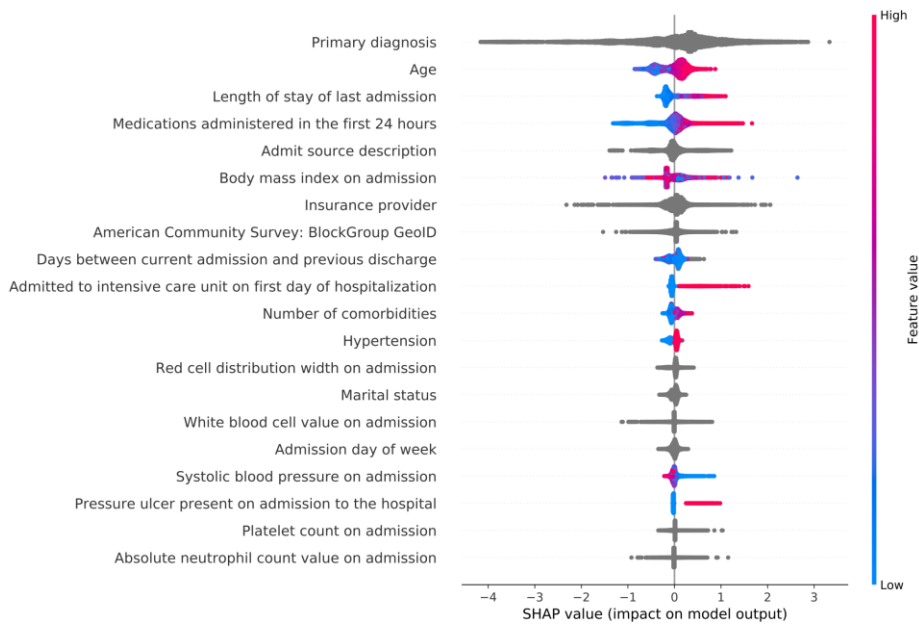



Supplementary Figure 6. SHAP Variable Interactions for 30 day readmission

**a** Age vs. number of past hospitalizations.

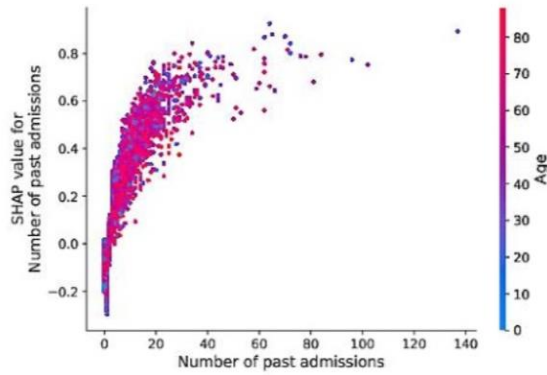

**b** Length of stay of current vs. past hospitalization.

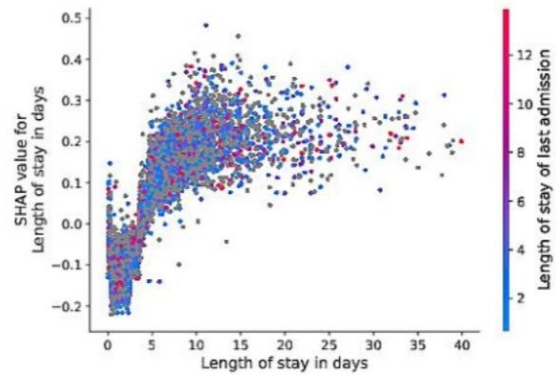

**c** Heart rate vs. age.

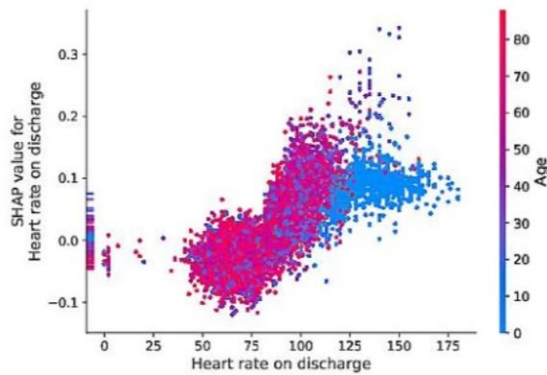

**d** Discharge disposition vs. number of past hospitalizations.

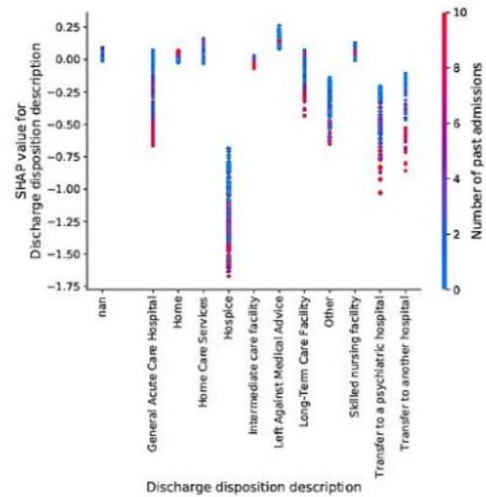

Supplementary Figure 7. SHAP Variable Interactions for length of stay > 5 days

**a** Number of medications administered in first 24 hours vs. age.

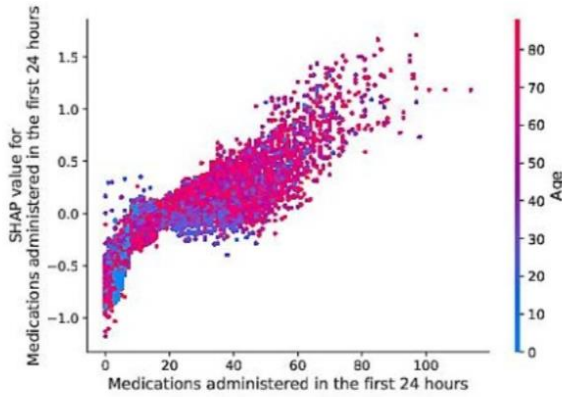

**b** Length of stay of last hospitalization vs. days since last hospitalization.

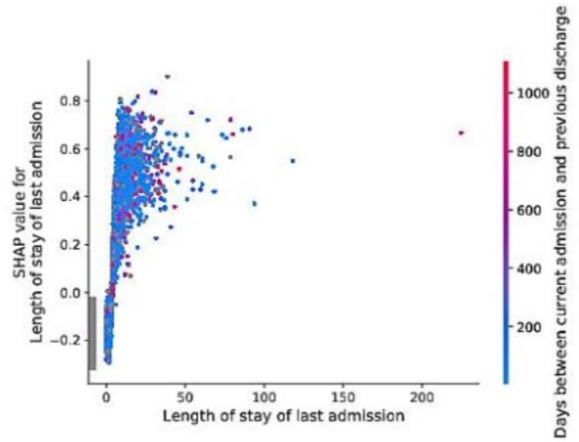

**c** Heart rate vs. age.

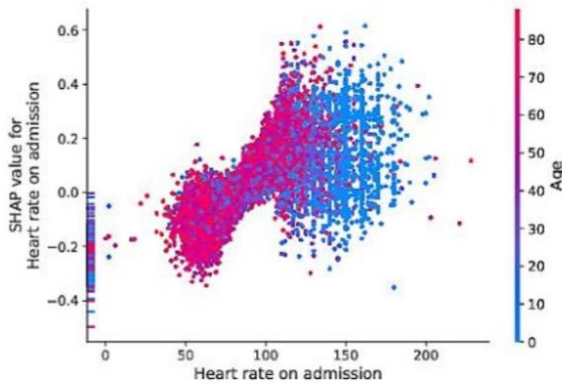

**d** ICU admission vs. number of medications administered in last 24 hours.

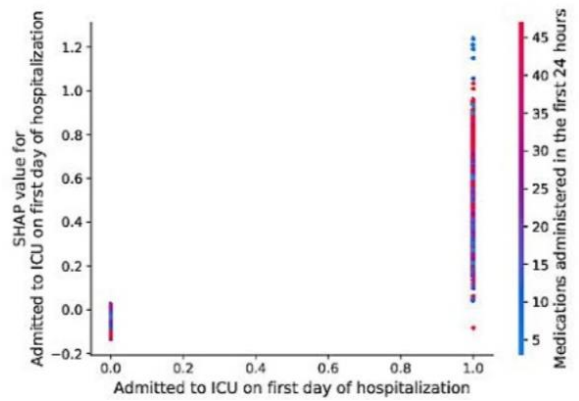



## Tables

### Supplementary Table 1. Model Performance Comparisons

#### a. 30 day readmission

| Algorithm                 | Average Precision     | ROC AUC               | Precision             | Recall                | Accuracy              | F1 Score              | Matthews Correlation Coefficient | Brier Score Loss      |
|---------------------------|-----------------------|-----------------------|-----------------------|-----------------------|-----------------------|-----------------------|----------------------------------|-----------------------|
| Gradient Boosting Machine | 0.383 [0.377-0.388]   | 0.758 [0.755 - 0.762] | 0.632 [0.620-0.647]   | 0.102 [0.098-0.106]   | 0.861 [0.860-0.861]   | 0.176 [0.169-0.182]   | 0.214 [0.208-0.220]              | 0.108 [0.108-0.109]   |
| Deep Neural Network       | 0.296 [0.292 - 0.300] | 0.731 [0.728 - 0.733] | 0.450 [0.445 - 0.454] | 0.110 [0.105 - 0.113] | 0.871 [0.869 - 0.873] | 0.177 [0.173 - 0.182] | 0.174 [0.171 - 0.178]            | 0.103 [0.100 - 0.108] |
| Logistic Regression       | 0.300 [0.296-0.305]   | 0.698 [0.694-0.702]   | 0.541 [0.521-0.565]   | 0.050 [0.047-0.053]   | 0.855 [0.855-0.856]   | 0.091 [0.087-0.097]   | 0.131 [0.124-0.140]              | 0.116 [0.115-0.116]   |
| Complement Naive Bayes    | 0.290 [0.285-0.294]   | 0.680 [0.675-0.686]   | 0.242 [0.240-0.246]   | 0.615 [0.605-0.620]   | 0.664 [0.661-0.672]   | 0.348 [0.344-0.351]   | 0.210 [0.204-0.214]              | 0.245 [0.245-0.245]   |
| Gaussian Naive Bayes      | 0.287 [0.282-0.291]   | 0.677 [0.672-0.680]   | 0.345 [0.333-0.373]   | 0.249 [0.202-0.269]   | 0.821 [0.816-0.834]   | 0.289 [0.262-0.302]   | 0.193 [0.185-0.201]              | 0.145 [0.140-0.147]   |
| Support Vector Machine    | 0.303 [0.298-0.307]   | 0.700 [0.696-0.703]   | 0.591 [0.565-0.618]   | 0.032 [0.029-0.034]   | 0.856 [0.855-0.856]   | 0.060 [0.056-0.065]   | 0.112 [0.105-0.119]              | 0.123 [0.119-0.125]   |

#### b. Length of Stay > 5 days

| Algorithm                 | Average Precision     | ROC AUC               | Precision             | Recall                | Accuracy              | F1 Score              | Matthews Correlation Coefficient | Brier Score Loss      |
|---------------------------|-----------------------|-----------------------|-----------------------|-----------------------|-----------------------|-----------------------|----------------------------------|-----------------------|
| Gradient Boosting Machine | 0.704 [0.702 - 0.707] | 0.828 [0.823 - 0.831] | 0.692 [0.690 - 0.695] | 0.542 [0.539 - 0.544] | 0.767 [0.765 - 0.770] | 0.608 [0.605 - 0.611] | 0.452 [0.449 - 0.456]            | 0.156 [0.152 - 0.159] |
| Deep Neural Network       | 0.674 [0.669 - 0.677] | 0.811 [0.807 - 0.814] | 0.639 [0.634 - 0.644] | 0.582 [0.577 - 0.585] | 0.747 [0.742 - 0.752] | 0.609 [0.604 - 0.612] | 0.424 [0.421 - 0.428]            | 0.169 [0.166 - 0.173] |
| Support Vector Machine    | 0.530 [0.527-0.532]   | 0.694 [0.693-0.696]   | 0.636 [0.632-0.640]   | 0.221 [0.219-0.224]   | 0.698 [0.697-0.699]   | 0.328 [0.325-0.331]   | 0.233 [0.229-0.235]              | 0.270 [0.253-0.286]   |
| Complement Naive Bayes    | 0.462 [0.460-0.465]   | 0.610 [0.608-0.612]   | 0.584 [0.581-0.588]   | 0.201 [0.198-0.202]   | 0.686 [0.686-0.687]   | 0.299 [0.296-0.300]   | 0.192 [0.190-0.194]              | 0.240 [0.240-0.240]   |
| Logistic Regression       | 0.529 [0.527-0.531]   | 0.694 [0.693-0.695]   | 0.625 [0.624-0.629]   | 0.238 [0.236-0.239]   | 0.699 [0.698-0.699]   | 0.344 [0.343-0.346]   | 0.236 [0.235-0.238]              | 0.198 [0.198-0.199]   |
| Gaussian Naive Bayes      | 0.505 [0.502-0.507]   | 0.678 [0.677-0.679]   | 0.581 [0.579-0.584]   | 0.260 [0.258-0.260]   | 0.691 [0.690-0.692]   | 0.359 [0.357-0.360]   | 0.220 [0.218-0.222]              | 0.250 [0.248-0.250]   |

### c. Model comparisons, extended

| Target                    | Algorithm              | Average             |                     |                     |                     |                         | Accuracy            | F1 Score             | Matthews            | Brier Score |
|---------------------------|------------------------|---------------------|---------------------|---------------------|---------------------|-------------------------|---------------------|----------------------|---------------------|-------------|
|                           |                        | Precision           | ROC AUC             | Precision           | Recall              | Correlation Coefficient |                     |                      | Loss                |             |
| Readmitted within 7 days  | Logistic Regression    | 0.101 [0.098-0.106] | 0.656 [0.650-0.662] | 0.308 [0.206-0.428] | 0.003 [0.002-0.005] | 0.949 [0.949-0.949]     | 0.006 [0.004-0.009] | 0.027 [0.016-0.040]  | 0.048 [0.047-0.048] |             |
|                           | Complement Naive Bayes | 0.097 [0.093-0.102] | 0.640 [0.634-0.648] | 0.080 [0.079-0.082] | 0.567 [0.555-0.577] | 0.647 [0.645-0.653]     | 0.141 [0.139-0.143] | 0.100 [0.096-0.105]  | 0.247 [0.246-0.247] |             |
|                           | Gaussian Naive Bayes   | 0.095 [0.092-0.100] | 0.637 [0.630-0.644] | 0.138 [0.130-0.146] | 0.126 [0.100-0.144] | 0.915 [0.910-0.923]     | 0.131 [0.117-0.142] | 0.087 [0.079-0.096]  | 0.074 [0.069-0.078] |             |
|                           | Support Vector Machine | 0.104 [0.100-0.108] | 0.660 [0.653-0.665] | 0.259 [0.072-0.478] | 0.001 [0.000-0.001] | 0.949 [0.949-0.949]     | 0.001 [0.000-0.002] | 0.010 [0.001-0.020]  | 0.049 [0.048-0.050] |             |
| Readmitted within 3 days  | Complement Naive Bayes | 0.039 [0.037-0.043] | 0.616 [0.607-0.625] | 0.033 [0.032-0.033] | 0.532 [0.516-0.549] | 0.644 [0.641-0.648]     | 0.061 [0.060-0.063] | 0.054 [0.050-0.059]  | 0.248 [0.247-0.248] |             |
|                           | Logistic Regression    | 0.041 [0.039-0.044] | 0.631 [0.622-0.639] | 0.154 [0.000-0.308] | 0.001 [0.000-0.002] | 0.978 [0.978-0.978]     | 0.002 [0.000-0.003] | 0.009 [-0.002-0.020] | 0.021 [0.021-0.021] |             |
|                           | Support Vector Machine | 0.042 [0.040-0.045] | 0.636 [0.627-0.643] | 0.000 [0.000-0.000] | 0.000 [0.000-0.000] | 0.978 [0.978-0.978]     | 0.000 [0.000-0.000] | 0.000 [0.000-0.000]  | 0.035 [0.023-0.207] |             |
|                           | Gaussian Naive Bayes   | 0.037 [0.035-0.039] | 0.617 [0.608-0.625] | 0.056 [0.051-0.062] | 0.091 [0.077-0.123] | 0.947 [0.931-0.952]     | 0.069 [0.063-0.077] | 0.045 [0.038-0.053]  | 0.048 [0.044-0.060] |             |
| Readmitted within 30 days | Logistic Regression    | 0.300 [0.296-0.305] | 0.698 [0.694-0.702] | 0.541 [0.521-0.565] | 0.050 [0.047-0.053] | 0.855 [0.855-0.856]     | 0.091 [0.087-0.097] | 0.131 [0.124-0.140]  | 0.116 [0.115-0.116] |             |
|                           | Complement Naive Bayes | 0.290 [0.285-0.294] | 0.680 [0.675-0.686] | 0.242 [0.240-0.246] | 0.615 [0.605-0.620] | 0.664 [0.661-0.672]     | 0.348 [0.344-0.351] | 0.210 [0.204-0.214]  | 0.245 [0.245-0.245] |             |
|                           | Gaussian Naive Bayes   | 0.287 [0.282-0.291] | 0.677 [0.672-0.680] | 0.345 [0.333-0.373] | 0.249 [0.202-0.269] | 0.821 [0.816-0.834]     | 0.289 [0.262-0.302] | 0.193 [0.185-0.201]  | 0.145 [0.140-0.147] |             |
|                           | Support Vector Machine | 0.303 [0.298-0.307] | 0.700 [0.696-0.703] | 0.591 [0.565-0.618] | 0.032 [0.029-0.034] | 0.856 [0.855-0.856]     | 0.060 [0.056-0.065] | 0.112 [0.105-0.119]  | 0.123 [0.119-0.125] |             |
| Hospital stay over 7 days | Complement Naive Bayes | 0.326 [0.322-0.331] | 0.638 [0.634-0.643] | 0.395 [0.387-0.403] | 0.221 [0.216-0.228] | 0.770 [0.769-0.772]     | 0.284 [0.278-0.291] | 0.169 [0.163-0.177]  | 0.240 [0.240-0.240] |             |
|                           | Gaussian Naive Bayes   | 0.347 [0.342-0.352] | 0.677 [0.674-0.681] | 0.404 [0.397-0.411] | 0.270 [0.264-0.276] | 0.768 [0.766-0.770]     | 0.323 [0.317-0.330] | 0.196 [0.189-0.203]  | 0.196 [0.194-0.198] |             |
|                           | Support Vector Machine | 0.367 [0.361-0.372] | 0.693 [0.690-0.697] | 0.562 [0.544-0.586] | 0.048 [0.045-0.050] | 0.797 [0.796-0.798]     | 0.088 [0.083-0.093] | 0.118 [0.110-0.126]  | 0.168 [0.156-0.179] |             |
|                           | Logistic Regression    | 0.366 [0.360-0.371] | 0.691 [0.688-0.694] | 0.551 [0.533-0.568] | 0.070 [0.067-0.074] | 0.797 [0.796-0.798]     | 0.124 [0.119-0.130] | 0.140 [0.133-0.148]  | 0.150 [0.150-0.151] |             |
| Hospital stay over 5 days | Support Vector Machine | 0.530 [0.527-0.532] | 0.694 [0.693-0.696] | 0.636 [0.632-0.640] | 0.221 [0.219-0.224] | 0.698 [0.697-0.699]     | 0.328 [0.325-0.331] | 0.233 [0.229-0.235]  | 0.270 [0.253-0.286] |             |
|                           | Complement Naive Bayes | 0.462 [0.460-0.465] | 0.610 [0.608-0.612] | 0.584 [0.581-0.588] | 0.201 [0.198-0.202] | 0.686 [0.686-0.687]     | 0.299 [0.296-0.300] | 0.192 [0.190-0.194]  | 0.240 [0.240-0.240] |             |
|                           | Logistic Regression    | 0.529 [0.527-0.531] | 0.694 [0.693-0.695] | 0.625 [0.624-0.629] | 0.238 [0.236-0.239] | 0.699 [0.698-0.699]     | 0.344 [0.343-0.346] | 0.236 [0.235-0.238]  | 0.198 [0.198-0.199] |             |
|                           | Gaussian Naive Bayes   | 0.505 [0.502-0.507] | 0.678 [0.677-0.679] | 0.581 [0.579-0.584] | 0.260 [0.258-0.260] | 0.691 [0.690-0.692]     | 0.359 [0.357-0.360] | 0.220 [0.218-0.222]  | 0.250 [0.248-0.250] |             |
| Hospital stay over 3 days | Complement Naive Bayes | 0.700 [0.698-0.702] | 0.624 [0.622-0.625] | 0.741 [0.737-0.743] | 0.249 [0.245-0.252] | 0.508 [0.506-0.509]     | 0.372 [0.368-0.376] | 0.155 [0.150-0.157]  | 0.242 [0.241-0.242] |             |

|                          |                        |                     |                     |                     |                     |                     |                     |                      |                     |
|--------------------------|------------------------|---------------------|---------------------|---------------------|---------------------|---------------------|---------------------|----------------------|---------------------|
|                          | Gaussian Naive Bayes   | 0.733 [0.730-0.735] | 0.673 [0.671-0.675] | 0.760 [0.757-0.764] | 0.329 [0.321-0.334] | 0.545 [0.541-0.548] | 0.459 [0.450-0.464] | 0.205 [0.198-0.211]  | 0.288 [0.285-0.293] |
|                          | Logistic Regression    | 0.753 [0.751-0.755] | 0.694 [0.692-0.695] | 0.669 [0.668-0.669] | 0.820 [0.819-0.821] | 0.656 [0.655-0.657] | 0.737 [0.736-0.737] | 0.266 [0.265-0.268]  | 0.215 [0.215-0.216] |
|                          | Support Vector Machine | 0.753 [0.751-0.754] | 0.693 [0.691-0.694] | 0.667 [0.666-0.667] | 0.825 [0.824-0.825] | 0.655 [0.655-0.656] | 0.737 [0.737-0.738] | 0.264 [0.263-0.265]  | 0.399 [0.369-0.430] |
| Readmitted within 5 days | Logistic Regression    | 0.072 [0.069-0.077] | 0.646 [0.639-0.653] | 0.253 [0.119-0.385] | 0.002 [0.001-0.003] | 0.963 [0.963-0.963] | 0.004 [0.002-0.006] | 0.019 [0.007-0.031]  | 0.035 [0.035-0.035] |
|                          | Gaussian Naive Bayes   | 0.068 [0.065-0.072] | 0.629 [0.622-0.637] | 0.101 [0.089-0.114] | 0.114 [0.091-0.172] | 0.929 [0.906-0.938] | 0.106 [0.097-0.119] | 0.070 [0.062-0.080]  | 0.062 [0.055-0.080] |
|                          | Complement Naive Bayes | 0.069 [0.066-0.073] | 0.631 [0.621-0.638] | 0.057 [0.056-0.058] | 0.555 [0.541-0.566] | 0.645 [0.642-0.651] | 0.104 [0.102-0.106] | 0.080 [0.075-0.085]  | 0.247 [0.247-0.247] |
|                          | Support Vector Machine | 0.074 [0.070-0.078] | 0.651 [0.643-0.657] | 0.149 [0.000-1.000] | 0.000 [0.000-0.000] | 0.963 [0.963-0.963] | 0.000 [0.000-0.001] | 0.002 [-0.001-0.014] | 0.041 [0.036-0.076] |

#### d. Length of Stay predictions without primary diagnosis code, gradient boosting

machine

| Target                    | Average Precision   | ROC AUC             | Precision           | Recall              | Accuracy            | F1 Score            | Matthews Correlation Coefficient | Brier Score Loss    |
|---------------------------|---------------------|---------------------|---------------------|---------------------|---------------------|---------------------|----------------------------------|---------------------|
| Hospital stay over 7 days | 0.491 [0.486-0.497] | 0.781 [0.778-0.784] | 0.635 [0.626-0.647] | 0.212 [0.203-0.222] | 0.813 [0.812-0.815] | 0.317 [0.308-0.328] | 0.288 [0.281-0.295]              | 0.134 [0.133-0.135] |
| Hospital stay over 5 days | 0.640 [0.636-0.644] | 0.781 [0.779-0.784] | 0.655 [0.650-0.660] | 0.439 [0.433-0.445] | 0.736 [0.734-0.738] | 0.526 [0.520-0.531] | 0.367 [0.361-0.372]              | 0.173 [0.172-0.174] |
| Hospital stay over 3 days | 0.811 [0.808-0.814] | 0.762 [0.759-0.765] | 0.716 [0.713-0.718] | 0.817 [0.814-0.821] | 0.702 [0.699-0.705] | 0.763 [0.761-0.765] | 0.373 [0.367-0.378]              | 0.192 [0.191-0.193] |

Supplementary Table 2. Categorized variables

|                                            |                                           |                                         |                                         |
|--------------------------------------------|-------------------------------------------|-----------------------------------------|-----------------------------------------|
| <u>Outcomes</u>                            | Received total parenteral nutrition       | Number of patients having complete      | Insurance provider                      |
| Length of stay in days                     | Pressure ulcer                            | blood counts drawn at this time,        | Payer class information unavailable     |
| Length of stay over 14 days                | Pressure ulcer absent                     | admission                               | <u>Comorbidities</u>                    |
| Length of stay over 3 days                 | Pressure ulcer information unavailable    | Number of patients having complete      | Anxiety                                 |
| Length of stay over 5 days                 | Pressure ulcer present on admission to    | blood counts drawn at this time,        | Cerebral palsy                          |
| Length of stay over 7 days                 | the hospital                              | discharge                               | Cerebrovascular disease                 |
| Readmitted within 15 days                  | Fall during admission                     | Number of patients having               | Chronic pulmonary disease               |
| Readmitted within 180 days                 | Clostridium difficile infection           | comprehensive metabolic panels drawn    | Congestive heart failure                |
| Readmitted within 20 days                  | Had a line infection during admission     | at this time, admit                     | Connective tissue disorder              |
| Readmitted within 28 days                  | Medications administered in hospital on   | Number of patients having               | Dementia                                |
| Readmitted within 3 days                   | day of admission                          | comprehensive metabolic panels drawn    | Depression                              |
| Readmitted within 30 days                  | Medications administered in the first 24  | at this time, discharge                 | Diabetes with chronic complication      |
| Readmitted within 365 days                 | hours                                     |                                         | Diabetes without chronic complication   |
| Readmitted within 3650 days                | Number of prescribed homegoing            | <u>Patient</u>                          | Epilepsy                                |
| Readmitted within 45 days                  | medications on day of discharge           | Age                                     | Has a diagnosis of AIDS or HIV          |
| Readmitted within 5 days                   | Opiates administered at any point during  | Race                                    | Hemiplegia or paraplegia                |
| Readmitted within 7 days                   | admission                                 | Primary language                        | Hip replacement                         |
| Readmitted within 90 days                  | Benzodiazepines administered during       | Marital status                          | Pressure ulcer, history of              |
|                                            | admission                                 |                                         | Hypertension                            |
| <u>Hospital events and information</u>     | Discharged with benzodiazepine            | Listed address is likely a new address  | Knee replacement                        |
| Admit source description                   | prescription                              |                                         | Metastatic solid tumor                  |
| Hospital transfer description              | Discharged with opiate prescription       | Primary diagnosis                       | Mild liver disease                      |
| Patient class description                  | Number of medications administered in     | Systolic blood pressure on admission    | Moderate or severe liver disease        |
| Discharge disposition description          | hospital on day of discharge              | Systolic blood pressure on discharge    | Myocardial infarction                   |
| Has had at least 1 emergency               | Received a physical or occupational       | Diastolic blood pressure on admission   | Number of morbidities                   |
| department encounter in the past 6         | therapy consult during admission          | Diastolic blood pressure on discharge   | Peptic ulcer disease                    |
| months                                     | Received a palliative care consult during | Temperature on admission                | Peripheral vascular disease             |
| Number of emergency department visits      | admission                                 | Temperature on discharge                | Pneumonia                               |
| in past 6 months                           | Received a spiritual care consult during  | Heart rate on admission                 | Psychosis                               |
| Admitted from emergency department         | admission                                 | Heart rate on discharge                 | Renal disease                           |
| Admitted to intensive care unit at any     | Received an infectious disease consult    | Body mass index on admission            | Rheumatic disease                       |
| point during current hospitalization       | during admission                          | Body mass index on discharge            | Short gut syndrome                      |
| Admitted to intensive care unit on first   | Received a hospice consult during         | Had a hospital discharge in the past 30 | Solid organ transplant                  |
| day of hospitalization                     | admission                                 | days                                    |                                         |
| Discharged from intensive care unit at     | Number of other patients admitted on      | Length of stay of last admission        | <u>Laboratory</u>                       |
| any point during current hospitalization   | same day                                  | Number of past admissions               | Absolute basophil count discharge value |
| Discharged from intensive care unit on     | Number of other patients discharged on    | Medicaid                                | Absolute eosinophil count at discharge  |
| first day of hospitalization               | same day                                  | Medicare                                | Absolute eosinophil count on admission  |
| Intensive care unit length of stay in days |                                           | Private health insurance                | Absolute lymphocyte count at discharge  |
| On dialysis                                |                                           | Insurance other                         | Absolute lymphocyte count on admission  |



|                                                      |                                                              |                                                                     |                                                          |
|------------------------------------------------------|--------------------------------------------------------------|---------------------------------------------------------------------|----------------------------------------------------------|
| Absolute monocyte count at discharge                 | Estimated glomerular filtration rate                         | Potassium admit value                                               | Comprehensive metabolic panel                            |
| Absolute monocyte count on admission                 | adjusted for African Americans, admit value                  | Potassium discharge value                                           | discharge time at night 6pm 10pm                         |
| Absolute neutrophil count value on admission         | Estimated glomerular filtration rate                         | Protein total admit value                                           | Comprehensive metabolic panel                            |
| Absolute neutrophil count value on discharge         | adjusted for African Americans, discharge value              | Protein total discharge value                                       | discharge time day of week                               |
| Absolute nucleated red blood cell count on admission | Estimated glomerular filtration rate                         | Red blood cell count at discharge                                   | Comprehensive metabolic panel                            |
| Absolute nucleated red blood cell count on discharge | adjusted for other races, admit value                        | Red blood cell value on admission                                   | discharge time during working day 7am 6pm                |
| Alanine aminotransferase admit value                 | Estimated glomerular filtration rate                         | Red cell distribution width value on admission                      | Comprehensive metabolic panel                            |
| Alanine aminotransferase discharge value             | adjusted for other races, discharge value                    | Red cell distribution width value on discharge                      | discharge time early morning 4am 7am                     |
| Albumin admit value                                  | Glucose value at discharge                                   | Sodium admit value                                                  | Comprehensive metabolic panel                            |
| Albumin discharge value                              | Glucose value on admission                                   | Sodium discharge value                                              | discharge time hour of day                               |
| Alkaline phosphatase value at discharge              | Hematocrit value at discharge                                | White blood cell count on discharge                                 | Comprehensive metabolic panel                            |
| Alkaline phosphatase value on admission              | Hematocrit value on admission                                | White blood cell value on admission                                 | discharge time month                                     |
| Anion gap admit value                                | Hemoglobin value at discharge                                | <u>Timing</u>                                                       | Comprehensive metabolic panel                            |
| Anion gap discharge value                            | Hemoglobin value on admission                                | Admission date, numeric week of year                                | discharge time on holiday                                |
| Aspartate aminotransferase admit value               | Lymphocyte count at discharge                                | Admission day of week                                               | Comprehensive metabolic panel                            |
| Aspartate aminotransferase discharge value           | Lymphocyte value on admission                                | Admitted between 10pm and 12am                                      | discharge time on weekend                                |
| Basophil admit value                                 | Mean corpuscular hemoglobin concentration admit value        | Admitted between 12am and 4am                                       | Day of week on discharge                                 |
| Basophil count at discharge                          | Mean corpuscular hemoglobin concentration value on discharge | Admitted between 4am and 7am                                        | Days between current admission and previous discharge    |
| Bilirubin total admit value                          | Mean corpuscular hemoglobin value at discharge               | Admitted between 6pm and 10pm                                       | Discharge between 4am and 7am                            |
| Bilirubin total discharge value                      | Mean corpuscular hemoglobin value on admission               | Admitted between 7am and 6pm                                        | Discharge date, numeric week of year                     |
| Blood urea nitrogen value on admission               | Mean corpuscular volume value on admission                   | Admitted on holiday                                                 | Discharge hour of day                                    |
| Blood urea nitrogen value on discharge               | Mean corpuscular volume value on discharge                   | Admitted on weekend                                                 | Discharged between 10pm and 12am                         |
| Calcium admit value                                  | Mean platelet volume admit value                             | Comprehensive metabolic panel admit time during working day 7am 6pm | Discharged between 12am and 4am                          |
| Calcium discharge value                              | Mean platelet volume discharge value                         | Comprehensive metabolic panel admit time early morning 4am 7am      | Discharged between 6pm and 10pm                          |
| Cancer, excluding skin cancers                       | Monocyte count admit value                                   | Comprehensive metabolic panel admit time hour of day                | Discharged between 7am and 6pm                           |
| Carbon dioxide admit value                           | Monocyte count discharge value                               | Comprehensive metabolic panel admit time month                      | Discharged on holiday                                    |
| Carbon dioxide discharge value                       | Neutrophil count at discharge                                | Comprehensive metabolic panel admit time on holiday                 | Discharged on weekend                                    |
| Chloride admit value                                 | Neutrophil value on admission                                | Comprehensive metabolic panel admit time on weekend                 | Discharged quarter of year                               |
| Chloride discharge value                             | Nucleated red cell count admit value                         | Comprehensive metabolic panel admit time on weekend                 | First complete blood count drawn on weekend              |
| Creatinine value on admission                        | Nucleated red cell count discharge value                     | Comprehensive metabolic panel admit time quarter                    | First complete blood count resulted between 12 and 4am   |
| Creatinine value on discharge                        | Platelet count at discharge                                  |                                                                     | First complete blood count resulted between 4am and 7am  |
| Eosinophil count admit value                         | Platelet count on admission                                  |                                                                     | First complete blood count resulted between 6pm and 10pm |
| Eosinophil count discharge value                     |                                                              |                                                                     | First complete blood count resulted between 7am and 6pm  |

|                                                                    |                                                                                |                                                                                           |
|--------------------------------------------------------------------|--------------------------------------------------------------------------------|-------------------------------------------------------------------------------------------|
| First complete blood count resulted day of week                    | Numeric month of year on admission                                             | American Community Survey: Income between 185 and 199 percent of the poverty ratio        |
| First complete blood count resulted on a US holiday                | Numeric month of year when last complete blood count resulted                  | American Community Survey: Income between 50 and 99 percent of poverty level              |
| First comprehensive metabolic panel resulted between 10pm and 12am | Numeric quarter of the year when first complete blood count resulted           | American Community Survey: Income over twice the poverty level                            |
| First comprehensive metabolic panel resulted between 12am and 4am  | Numeric quarter of year on admission                                           | American Community Survey: Median age                                                     |
| First comprehensive metabolic panel resulted between 6pm and 10pm  | Numeric quarter of year when last complete blood count resulted                | American Community Survey: Median age of females                                          |
| First comprehensive metabolic panel resulted between 10pm and 12am | Numeric quarter of year when last comprehensive metabolic panel resulted       | American Community Survey: Median age of males                                            |
| Last complete blood count resulted between 10pm and 12am           | Numeric week of the year, last complete blood count resulted                   | American Community Survey: Number of families with female householder, no husband present |
| Last complete blood count resulted between 10pm and 12am           | Numeric week of year                                                           | American Community Survey: Number of families with male householder, no wife present      |
| Last complete blood count resulted between 12am and 4am            | Numeric week of year, first comprehensive metabolic panel resulted             | American Community Survey: Number of householders living alone                            |
| Last complete blood count resulted between 4 and 7am               | Numeric week of year, last comprehensive metabolic panel resulted              | American Community Survey: Number of householders not living alone                        |
| Last complete blood count resulted between 6 and 10pm              | Weekday of last complete blood count result                                    | American Community Survey: Number of married couple families                              |
| Last complete blood count resulted between 7am and 6pm             | <u>American Community Survey (Census Information)</u>                          | American Community Survey: Population employed                                            |
| Last complete blood count resulted on a US holiday                 | American Community Survey: Average size of households, renters and owners      | American Community Survey: Population identifying as two or more races                    |
| Last complete blood count resulted on a weekend day                | American Community Survey: BlockGroup GeoID                                    | American Community Survey: Population unemployed                                          |
| Last comprehensive metabolic panel resulted between 10pm and 12am  | American Community Survey: Employed population count                           | American Community Survey: Race, black alone                                              |
| Last comprehensive metabolic panel resulted between 12am and 4am   | American Community Survey: Income below 50 percent of poverty level            | American Community Survey: Race, white alone                                              |
| Month of the year when first complete blood count resulted         | American Community Survey: Income between 100 and 124 percent of poverty level | American Community Survey: Total population count                                         |
| Month of year at discharge                                         | American Community Survey: Income between 125 and 149 percent of poverty level | American Community Survey: Total population not in labor force                            |
| Numeric hour of day of admission                                   | American Community Survey: Income between 150 and 184 percent of poverty level |                                                                                           |
| Numeric hour of day when first complete blood count resulted       |                                                                                |                                                                                           |
| Numeric hour of day when last complete blood count resulted        |                                                                                |                                                                                           |



## References

1. Milinovich A, Kattan MW. Extracting and utilizing electronic health data from Epic for research. *Ann Transl Med* 2018;6(3).
2. Lind KD, Noel-Miller CM, Sangaralingham LR, et al. Increasing Trends in the Use of Hospital Observation Services for Older Medicare Advantage and Privately Insured Patients. *Med Care Res Rev* 2019;76(2):229–39.
3. Zuckerman RB, Sheingold SH, Orav EJ, Ruhter J, Epstein AM. Readmissions, Observation, and the Hospital Readmissions Reduction Program. *N Engl J Med* 2016;374(16):1543–51.
4. Natekin A, Knoll A. Gradient boosting machines, a tutorial. *Front Neuroinformatics* 2013;7:21.
5. Ke G, Meng Q, Finley T, et al. LightGBM: A Highly Efficient Gradient Boosting Decision Tree [Internet]. In: Guyon I, Luxburg UV, Bengio S, et al., editors. *Advances in Neural Information Processing Systems 30*. Curran Associates, Inc.; 2017. p. 3146–3154. Available from: <http://papers.nips.cc/paper/6907-lightgbm-a-highly-efficient-gradient-boosting-decision-tree.pdf>
6. Lundberg SM, Erion G, Chen H, et al. Explainable AI for Trees: From Local Explanations to Global Understanding. 2019.
7. Lundberg SM, Lee S-I. A Unified Approach to Interpreting Model Predictions [Internet]. In: Guyon I, Luxburg UV, Bengio S, et al., editors. *Advances in Neural Information Processing Systems 30*. Curran Associates, Inc.; 2017. p. 4765–4774. Available from: <http://papers.nips.cc/paper/7062-a-unified-approach-to-interpreting-model-predictions.pdf>
8. Steyerberg EW, Vickers AJ, Cook NR, et al. Assessing the performance of prediction models: a framework for traditional and novel measures. *Epidemiol Camb Mass* 2010;21(1):128–138.
9. Pencina MJ, D’Agostino RB. Evaluating discrimination of risk prediction models: the C statistic. *Jama* 2015;314(10):1063–1064.
10. Chai T, Draxler RR. Root mean square error (RMSE) or mean absolute error (MAE)?—Arguments against avoiding RMSE in the literature. *Geosci Model Dev* 2014;7(3):1247–1250.
